# Supplementary material for: Diet-induced gene expression of isolated pancreatic islets from a polygenic mouse model of the metabolic syndrome
Source: PubMed Central journal article supplement — Diabetologia. 2009 Nov 10;53(2):309–20. doi: 10.1007/s00125-009-1576-4 (PMC2797618; doi:10.1007/s00125-009-1576-4), 2009-11-10
Supplement: 125_2009_1576_MOESM1_ESM.pdf [file 125_2009_1576_MOESM1_ESM.pdf]

**Electronic supplementary material**

**ESM Table 1** The 100 most abundant transcripts in islets and islet-enrichment score

| Ensemble gene      | Gene                 |                                                                                       | Relative fluorescence |          |                            |
|--------------------|----------------------|---------------------------------------------------------------------------------------|-----------------------|----------|----------------------------|
|                    | Symbol               | Description                                                                           | Islets                | Pancreas | Ratio<br>(islets:pancreas) |
| ENSMUSG00000041681 | <i>Iapp</i>          | Islet amyloid polypeptide gene                                                        | 908.72                | 335.66   | 2.71                       |
| ENSMUSG00000064367 | <i>mt-Nd5</i>        | Mitochondrially encoded NADH dehydrogenase 6 gene                                     | 719.11                | 372.76   | 1.93                       |
| ENSMUSG00000000394 | <i>Gcg</i>           | Glucagon gene                                                                         | 621.75                | 108.27   | 5.74                       |
| ENSMUSG00000000215 | <i>Ins2</i>          | Insulin II gene                                                                       | 528.64                | 415.27   | 1.27                       |
| ENSMUSG00000037852 | <i>Cpe</i>           | Carboxypeptidase E gene                                                               | 432.12                | 23.07    | 18.73                      |
| ENSMUSG00000029390 | <i>Tmed2</i>         | Transmembrane emp24 domain trafficking protein 2 gene                                 | 412.64                | 298.59   | 1.38                       |
| ENSMUSG00000022982 | <i>Sod1</i>          | Superoxide dismutase 1, soluble gene                                                  | 374.77                | 92.08    | 4.07                       |
| ENSMUSG00000035804 | <i>Ins1</i>          | Insulin I gene                                                                        | 362.02                | 265.54   | 1.36                       |
| ENSMUSG00000003814 | <i>Calr</i>          | Calreticulin gene                                                                     | 341.15                | 12.81    | 26.64                      |
| ENSMUSG00000031007 | <i>Atp6ap2</i>       | ATPase, H <sup>+</sup> transporting, lysosomal accessory protein 2 gene               | 305.98                | 69.98    | 4.37                       |
| ENSMUSG00000020402 | <i>Vdac1</i>         | Voltage-dependent anion channel 1 gene                                                | 295.13                | 27.01    | 10.92                      |
| ENSMUSG00000061808 | <i>Ttr</i>           | Transthyretin gene                                                                    | 281.41                | 42.78    | 6.58                       |
| ENSMUSG00000021194 | <i>Chga</i>          | Chromogranin A gene                                                                   | 258.99                | 24.73    | 10.47                      |
| ENSMUSG00000027350 | <i>Chgb</i>          | Chromogranin B gene                                                                   | 255.84                | 2.95     | 86.76                      |
| ENSMUSG00000050711 | <i>Scg2</i>          | Secretogranin II gene                                                                 | 244.79                | 30.03    | 8.15                       |
| ENSMUSG00000022095 | <i>Rai16</i>         | Family with sequence similarity 160, member B2 gene                                   | 237.73                | 2.35     | 101.16                     |
| ENSMUSG00000022198 | <i>Pabpn1</i>        | Poly(A) binding protein, nuclear 1 gene                                               | 205.29                | 29.63    | 6.93                       |
| ENSMUSG00000014294 | <i>Ndufa2</i>        | NADH dehydrogenase (ubiquinone) 1 alpha subcomplex, 2 gene                            | 198.89                | 54.08    | 3.68                       |
| ENSMUSG00000020917 | <i>Acly</i>          | ATP citrate lyase gene                                                                | 198.54                | 30.06    | 6.61                       |
| ENSMUSG00000023150 | <i>Ivns1abp</i>      | Influenza virus NS1A binding protein gene                                             | 193.17                | 77.30    | 2.50                       |
| ENSMUSG00000027984 | <i>Hadh</i>          | Hydroxyacyl-Coenzyme A dehydrogenase gene                                             | 182.53                | 116.09   | 1.57                       |
| ENSMUSG00000024038 | <i>1500032D16Rik</i> | NADH dehydrogenase                                                                    | 181.64                | 160.22   | 1.13                       |
| ENSMUSG00000058569 | <i>Tmed9</i>         | Transmembrane emp24 protein transport domain containing 9 gene                        | 172.88                | 7.05     | 24.53                      |
| ENSMUSG00000008348 | <i>EG216818</i>      | Ubiquitin A-52 residue ribosomal protein fusion product 1 gene                        | 159.08                | 54.31    | 2.93                       |
| ENSMUSG00000007564 | <i>Ppp2r1a</i>       | Protein phosphatase 2 (formerly 2A), regulatory subunit A (PR 65), alpha isoform gene | 154.87                | 22.89    | 6.77                       |
| ENSMUSG00000002455 | <i>Prpf6</i>         | PRP6 pre-mRNA splicing factor 6 homologue (yeast) gene                                | 144.00                | 2.96     | 48.71                      |

| Ensemble gene      | Gene                 |                                                                                                  | Relative fluorescence |          |                         |
|--------------------|----------------------|--------------------------------------------------------------------------------------------------|-----------------------|----------|-------------------------|
|                    | Symbol               | Description                                                                                      | Islets                | Pancreas | Ratio (islets:pancreas) |
| ENSMUSG00000039218 | <i>Srrm2</i>         | Serine/arginine repetitive matrix 2 gene                                                         | 139.45                | 52.88    | 2.64                    |
| ENSMUSG00000037822 | <i>1110003E01Rik</i> | RIKEN cDNA 1110003E01 gene gene                                                                  | 138.34                | 145.18   | 0.95                    |
| ENSMUSG00000030062 | <i>Rpn1</i>          | Ribophorin I gene                                                                                | 136.94                | 58.03    | 2.36                    |
| ENSMUSG00000020048 | <i>Hsp90b1</i>       | Heat shock protein 90, beta (Grp94), member 1 gene                                               | 136.51                | 9.52     | 14.34                   |
| ENSMUSG00000005232 | <i>G6pc2</i>         | Glucose 6-phosphatase, catalytic, 2 gene                                                         | 127.71                | 6.70     | 19.06                   |
| ENSMUSG00000023089 | <i>Ndufa5</i>        | NADH dehydrogenase (ubiquinone) 1 alpha subcomplex, 5 gene                                       | 126.40                | 46.54    | 2.72                    |
| ENSMUSG00000020076 | <i>Ddx50</i>         | DEAD (Asp-Glu-Ala-Asp) box polypeptide 50 gene                                                   | 125.97                | 22.29    | 5.65                    |
| ENSMUSG00000028691 | <i>Prdx1</i>         | Peroxiredoxin 1 gene                                                                             | 125.76                | 32.33    | 3.89                    |
| ENSMUSG00000060938 | <i>Rpl26</i>         | Ribosomal protein L26 gene                                                                       | 122.95                | 381.35   | 0.32                    |
| ENSMUSG00000032181 | <i>Scg3</i>          | Secretogranin III gene                                                                           | 120.72                | 2.55     | 47.40                   |
| ENSMUSG00000024225 | <i>Clps</i>          | Colipase, pancreatic gene                                                                        | 120.02                | 1208.83  | 0.10                    |
| ENSMUSG00000036256 | <i>Igfbp7</i>        | Insulin-like growth factor binding protein 7 gene                                                | 104.88                | 59.91    | 1.75                    |
| ENSMUSG00000032353 | <i>Tmed3</i>         | Transmembrane emp24 domain containing 3 gene                                                     | 104.03                | 188.05   | 0.55                    |
| ENSMUSG00000028820 | <i>Sfpq</i>          | Splicing factor proline/glutamine rich (polypyrimidine tract binding protein associated) gene    | 103.85                | 3.95     | 26.27                   |
| ENSMUSG00000015401 | <i>Tmem27</i>        | Transmembrane protein 27 gene                                                                    | 101.37                | 3.86     | 26.23                   |
| ENSMUSG00000041571 | <i>Sepw1</i>         | Selenoprotein W, muscle 1 gene                                                                   | 101.32                | 17.97    | 5.64                    |
| ENSMUSG00000022315 | <i>Slc30a8</i>       | Solute carrier family 30 (zinc transporter), member 8 gene                                       | 101.26                | 1.40     | 72.43                   |
| ENSMUSG00000006476 | <i>Nelf</i>          | Nasal embryonic LHRH factor gene                                                                 | 98.68                 | 35.18    | 2.80                    |
| ENSMUSG00000028798 | <i>Eif3i</i>         | Eukaryotic translation initiation factor 3, subunit I gene                                       | 97.79                 | 124.32   | 0.79                    |
| ENSMUSG00000054428 | <i>Atpif1</i>        | ATPase inhibitory factor 1 gene                                                                  | 97.70                 | 10.33    | 9.45                    |
| ENSMUSG00000021876 | <i>Rnase4</i>        | ribonuclease, RNase A family 4 gene                                                              | 96.75                 | 175.98   | 0.55                    |
| ENSMUSG00000024425 | <i>Ndfip1</i>        | Nedd4 family interacting protein 1 gene                                                          | 94.86                 | 109.11   | 0.87                    |
| ENSMUSG00000026864 | <i>Hspa5</i>         | Heat shock protein 5 gene                                                                        | 94.35                 | 76.12    | 1.24                    |
| ENSMUSG00000020849 | <i>Ywhae</i>         | Tyrosine 3-monooxygenase/tryptophan 5-monooxygenase activation protein, epsilon polypeptide gene | 93.84                 | 48.07    | 1.95                    |
| ENSMUSG00000035268 | <i>Pkig</i>          | Protein kinase inhibitor, gamma gene                                                             | 92.94                 | 10.22    | 9.09                    |
| ENSMUSG00000035530 | <i>Eif1</i>          | Eukaryotic translation initiation factor 1 gene                                                  | 91.53                 | 96.57    | 0.95                    |
| ENSMUSG00000022635 | <i>Zcrb1</i>         | Zinc finger CCHC-type and RNA binding motif 1 gene                                               | 87.95                 | 10.98    | 8.01                    |
| ENSMUSG00000024516 | <i>Sec11c</i>        | SEC11 homologue C ( <i>S. cerevisiae</i> ) gene                                                  | 85.22                 | 104.20   | 0.82                    |
| ENSMUSG00000036199 | <i>Ndufa13</i>       | NADH dehydrogenase (ubiquinone) 1 alpha subcomplex, 13 gene                                      | 85.12                 | 129.72   | 0.66                    |
| ENSMUSG00000027828 | <i>Ssr3</i>          | Signal sequence receptor, gamma gene                                                             | 84.61                 | 105.71   | 0.80                    |

| Ensemble gene      | Gene                 |                                                                                                    | Relative fluorescence |          |                         |
|--------------------|----------------------|----------------------------------------------------------------------------------------------------|-----------------------|----------|-------------------------|
|                    | Symbol               | Description                                                                                        | Islets                | Pancreas | Ratio (islets:pancreas) |
| ENSMUSG00000050071 | <i>Bex1</i>          | Brain expressed X-linked 2 gene                                                                    | 81.97                 | 2.24     | 36.61                   |
| ENSMUSG00000052825 | <i>AC140437.3</i>    |                                                                                                    | 79.65                 | 48.58    | 1.64                    |
| ENSMUSG00000058672 | <i>Tubb2a</i>        | Tubulin, beta 2a gene                                                                              | 78.30                 | 3.63     | 21.54                   |
| ENSMUSG00000031957 | <i>Ctrb1</i>         | Chymotrypsinogen B1 gene                                                                           | 78.06                 | 834.65   | 0.09                    |
| ENSMUSG00000057069 | <i>Ero11b</i>        | ERO1-like beta ( <i>S. cerevisiae</i> ) gene                                                       | 77.66                 | 68.36    | 1.14                    |
| ENSMUSG00000027273 | <i>Snap25</i>        | Synaptosomal-associated protein 25 gene                                                            | 76.73                 | 0.33     | 232.96                  |
| ENSMUSG00000025428 | <i>Atp5a1</i>        | ATP synthase, H <sup>+</sup> transporting, mitochondrial F1 complex, alpha subunit, isoform 1 gene | 76.11                 | 77.76    | 0.98                    |
| ENSMUSG00000042747 | <i>Krtcap2</i>       | Keratinocyte associated protein 2 gene                                                             | 75.93                 | 106.12   | 0.72                    |
| ENSMUSG00000020321 | <i>Mdh1</i>          | Malate dehydrogenase 1, NAD (soluble) gene                                                         | 74.80                 | 33.33    | 2.24                    |
| ENSMUSG00000058351 | <i>Snhg8</i>         | Small nucleolar RNA host gene (non-protein coding) 8 gene                                          | 72.88                 | 15.64    | 4.66                    |
| ENSMUSG00000041697 | <i>Cox6a1</i>        | Cytochrome c oxidase, subunit VI a, polypeptide 1 gene                                             | 72.70                 | 287.59   | 0.25                    |
| ENSMUSG00000020863 | <i>3300001P08Rik</i> | RIKEN cDNA 3300001P08 gene gene                                                                    | 72.09                 | 5.23     | 13.77                   |
| ENSMUSG00000057163 | <i>Prss2</i>         | Protease, serine, 2 gene                                                                           | 72.00                 | 847.61   | 0.08                    |
| ENSMUSG00000032182 | <i>Yipf2</i>         | Yip1 domain family, member 2 gene                                                                  | 71.96                 | 9.60     | 7.50                    |
| ENSMUSG00000004980 | <i>Hnrmpa2b1</i>     | Heterogeneous nuclear ribonucleoprotein A2/B1 gene                                                 | 70.98                 | 19.71    | 3.60                    |
| ENSMUSG00000023236 | <i>Scg5</i>          | Secretogranin V gene                                                                               | 70.46                 | 5.66     | 12.45                   |
| ENSMUSG00000020719 | <i>Ddx5</i>          | DEAD (Asp-Glu-Ala-Asp) box polypeptide 5 gene                                                      | 69.55                 | 28.08    | 2.48                    |
| ENSMUSG00000023048 | <i>Prr13</i>         | Proline rich 13 gene                                                                               | 69.42                 | 14.40    | 4.82                    |
| ENSMUSG00000031896 | <i>Ctrl</i>          | Chymotrypsin-like gene                                                                             | 68.44                 | 1080.64  | 0.06                    |
| ENSMUSG00000027889 | <i>Ampd2</i>         | Adenosine monophosphate deaminase 2 (isoform L) gene                                               | 68.43                 | 17.64    | 3.88                    |
| ENSMUSG00000066357 | <i>Wdr6</i>          | WD repeat domain 6 gene                                                                            | 66.98                 | 7.06     | 9.48                    |
| ENSMUSG00000032349 | <i>Elovl5</i>        | ELOVL family member 5, elongation of long chain fatty acids (yeast) gene                           | 66.42                 | 20.06    | 3.31                    |
| ENSMUSG00000035048 | <i>Anapc13</i>       | Anaphase promoting complex subunit 13 gene                                                         | 66.08                 | 45.92    | 1.44                    |
| ENSMUSG00000028675 | <i>Pnrc2</i>         | Proline-rich nuclear receptor coactivator 2 gene                                                   | 65.54                 | 25.41    | 2.58                    |
| ENSMUSG00000034951 | <i>Cog7</i>          | Component of oligomeric golgi complex 7 gene                                                       | 65.13                 | 6.12     | 10.63                   |
| ENSMUSG00000024975 | <i>Pdcd4</i>         | Programmed cell death 4 gene                                                                       | 64.67                 | 87.64    | 0.74                    |
| ENSMUSG00000024735 | <i>Prpf19</i>        | PRP19/PSO4 pre-mRNA processing factor 19 homologue ( <i>S. cerevisiae</i> ) gene                   | 64.51                 | 13.05    | 4.94                    |
| ENSMUSG00000030717 | <i>Nupr1</i>         | Nuclear protein 1 gene                                                                             | 64.43                 | 326.83   | 0.20                    |
| ENSMUSG00000029227 | <i>Fip111</i>        | FIP1 like 1 ( <i>S. cerevisiae</i> ) gene                                                          | 64.13                 | 1.97     | 32.57                   |

| Ensemble gene       | Gene                 |                                                                                                | Relative fluorescence |          |                         |
|---------------------|----------------------|------------------------------------------------------------------------------------------------|-----------------------|----------|-------------------------|
|                     | Symbol               | Description                                                                                    | Islets                | Pancreas | Ratio (islets:pancreas) |
| ENSMUSG00000013593  | <i>Ndufs2</i>        | NADH dehydrogenase (ubiquinone) Fe-S protein 2 gene                                            | 62.27                 | 47.18    | 1.32                    |
| ENSMUSG00000002265  | <i>Peg3</i>          | Paternally expressed 3 gene                                                                    | 61.90                 | 0.38     | 162.01                  |
| ENSMUSG000000053332 | <i>Gas5</i>          | Growth arrest specific 5 gene                                                                  | 61.63                 | 12.04    | 5.12                    |
| ENSMUSG000000021807 | <i>2700060E02Rik</i> | RIKEN cDNA 2700060E02 gene gene                                                                | 60.96                 | 1.81     | 33.68                   |
| ENSMUSG000000000184 | <i>Ccnd2</i>         | Cyclin D2 gene                                                                                 | 59.99                 | 3.44     | 17.43                   |
| ENSMUSG000000031532 | <i>Tmem66</i>        | Transmembrane protein 66 gene                                                                  | 59.97                 | 129.92   | 0.46                    |
| ENSMUSG000000027690 | <i>Slc2a2</i>        | Solute carrier family 2 (facilitated glucose transporter), member 2 gene                       | 58.42                 | 1.39     | 42.01                   |
| ENSMUSG000000029146 | <i>Snx17</i>         | Sorting nexin 17 gene                                                                          | 58.24                 | 107.91   | 0.54                    |
| ENSMUSG000000028419 | <i>Chmp5</i>         | Chromatin modifying protein 5 gene                                                             | 57.99                 | 51.94    | 1.12                    |
| ENSMUSG000000004460 | <i>Dnajb11</i>       | DnaJ (Hsp40) homologue, subfamily B, member 11 gene                                            | 57.90                 | 20.08    | 2.88                    |
| ENSMUSG000000016252 | <i>Atp5e</i>         | ATP synthase, H <sup>+</sup> transporting, mitochondrial F1 complex, epsilon subunit gene      | 57.00                 | 167.72   | 0.34                    |
| ENSMUSG000000014905 | <i>Dnajb9</i>        | DnaJ (Hsp40) homologue, subfamily B, member 9 gene                                             | 56.98                 | 34.32    | 1.66                    |
| ENSMUSG000000068823 | <i>Csde1</i>         | Cold shock domain containing E1, RNA binding gene                                              | 56.60                 | 66.14    | 0.86                    |
| ENSMUSG000000076432 | <i>Ywhaq</i>         | Tyrosine 3-monooxygenase/tryptophan 5-monooxygenase activation protein, theta polypeptide gene | 55.09                 | 34.85    | 1.58                    |

The fluorescence intensities from islet and pancreas samples for each of the ~10,000 transcripts expressed were normalised to the median fluorescence intensity of the respective tissue sample and used for calculation of the ratio of relative intensities (islets:pancreas) as a measure of islet-enrichment
