# Supplementary material for: Diet-induced gene expression of isolated pancreatic islets from a polygenic mouse model of the metabolic syndrome
Source: PubMed Central journal article supplement — Diabetologia. 2009 Nov 10;53(2):309–20. doi: 10.1007/s00125-009-1576-4 (PMC2797618; doi:10.1007/s00125-009-1576-4), 2009-11-10
Supplement: 125_2009_1576_MOESM2_ESM.pdf [file 125_2009_1576_MOESM2_ESM.pdf]

## Electronic supplementary material

**ESM Table 2** The most highly enriched pancreatic transcripts in islets

| Ensemble gene      | Gene                      |                                                                                | Relative fluorescence |          |                         |
|--------------------|---------------------------|--------------------------------------------------------------------------------|-----------------------|----------|-------------------------|
|                    | Symbol                    | Description                                                                    | Islets                | Pancreas | Ratio (islets:pancreas) |
| ENSMUSG00000027273 | <i>Snap25</i>             | Synaptosomal-associated protein 25 gene                                        | 76.73                 | 0.33     | 232.96                  |
| ENSMUSG00000002265 | <i>Peg3</i>               | Paternally expressed 3 gene                                                    | 61.90                 | 0.38     | 162.01                  |
| ENSMUSG00000026018 | <i>Ica11</i>              | Islet cell autoantigen 1-like gene                                             | 23.71                 | 0.17     | 141.73                  |
| ENSMUSG00000022095 | <i>Rai16</i>              | Family with sequence similarity 160, member B2 gene                            | 237.73                | 2.35     | 101.16                  |
| ENSMUSG00000044988 | <i>Ucn3</i>               | Urocortin 3 gene                                                               | 24.00                 | 0.25     | 95.91                   |
| ENSMUSG00000027350 | <i>Chgb</i>               | Chromogranin B gene                                                            | 255.84                | 2.95     | 86.76                   |
| ENSMUSG00000033821 | <i>RP23-101H1.6</i>       |                                                                                | 20.14                 | 0.26     | 77.68                   |
| ENSMUSG00000056061 | <i>OTTMUSG00000016300</i> | Predicted gene, OTTMUSG00000016300 gene                                        | 28.67                 | 0.38     | 74.84                   |
| ENSMUSG00000026989 | <i>Dapl1</i>              | Death associated protein-like 1 gene                                           | 38.56                 | 0.52     | 73.99                   |
| ENSMUSG00000022315 | <i>Slc30a8</i>            | Solute carrier family 30 (zinc transporter), member 8 gene                     | 101.26                | 1.40     | 72.43                   |
| ENSMUSG00000024027 | <i>Glp1r</i>              | Glucagon-like peptide 1 receptor gene                                          | 18.32                 | 0.26     | 70.89                   |
| ENSMUSG00000031144 | <i>Syp</i>                | Protein tyrosine phosphatase, non-receptor type 11 gene                        | 52.17                 | 0.75     | 69.40                   |
| ENSMUSG00000044139 | <i>BC039632</i>           | Polyserase-3 Precursor (EC 3.4.21.-) (Polyserine protease 3)                   | 54.51                 | 0.80     | 68.14                   |
| ENSMUSG00000020680 | <i>Taf15</i>              | TAF15 RNA polymerase II, TATA box binding protein (TBP)-associated factor gene | 11.33                 | 0.18     | 62.61                   |
| ENSMUSG00000028354 | <i>Fmn2</i>               | Formin 2 gene                                                                  | 13.70                 | 0.23     | 59.41                   |
| ENSMUSG00000047507 | <i>Baiap3</i>             | BAI1-associated protein 3 gene                                                 | 12.55                 | 0.24     | 53.09                   |
| ENSMUSG00000039395 | <i>Mreg</i>               | Melanoregulin gene                                                             | 16.25                 | 0.31     | 52.27                   |
| ENSMUSG00000055409 | <i>Nell1</i>              | NEL-like 1 (chicken) gene                                                      | 19.52                 | 0.38     | 50.92                   |
| ENSMUSG00000002455 | <i>Prpf6</i>              | PRP6 pre-mrna splicing factor 6 homologue (yeast) gene                         | 144.00                | 2.96     | 48.71                   |
| ENSMUSG00000032181 | <i>Scg3</i>               | Secretogranin III gene                                                         | 120.72                | 2.55     | 47.40                   |
| ENSMUSG00000025246 | <i>Tbl1x</i>              | Transducin (beta)-like 1 X-linked gene                                         | 5.25                  | 0.11     | 46.83                   |
| ENSMUSG00000024290 | <i>Rock1</i>              | Rho-associated coiled-coil containing protein kinase 1 gene                    | 18.72                 | 0.40     | 46.34                   |
| ENSMUSG00000026072 | <i>Il1r1</i>              | Interleukin 1 receptor, type I gene                                            | 34.85                 | 0.76     | 45.58                   |
| ENSMUSG00000024293 | <i>Esco1</i>              | Establishment of cohesion 1 homologue 1 ( <i>S. Cerevisiae</i> ) gene          | 16.27                 | 0.36     | 45.41                   |
| ENSMUSG00000021803 | <i>Pcdh21</i>             | Protocadherin 21 gene                                                          | 13.86                 | 0.31     | 44.72                   |
| ENSMUSG00000034701 | <i>Neurod1</i>            | Neurogenic differentiation 1 gene                                              | 24.26                 | 0.54     | 44.53                   |
| ENSMUSG00000027168 | <i>Pax6</i>               | Paired box gene 6 gene                                                         | 24.20                 | 0.56     | 42.88                   |
| ENSMUSG00000038708 | <i>Golga4</i>             | Golgi autoantigen, golgin subfamily a, 4 gene                                  | 50.22                 | 1.18     | 42.65                   |
| ENSMUSG00000027690 | <i>Slc2a2</i>             | Solute carrier family 2 (facilitated glucose transporter), member 2 gene       | 58.42                 | 1.39     | 42.01                   |

| Ensemble gene      | Gene                 |                                                                                      | Relative fluorescence |          |                         |
|--------------------|----------------------|--------------------------------------------------------------------------------------|-----------------------|----------|-------------------------|
|                    | Symbol               | Description                                                                          | Islets                | Pancreas | Ratio (islets:pancreas) |
| ENSMUSG00000069072 | <i>Slc7a14</i>       | Solute carrier family 7 (cationic amino acid transporter, y+ system), member 14 gene | 22.01                 | 0.53     | 41.87                   |
| ENSMUSG00000070733 | <i>Fryl</i>          | Furry homolog-like (Drosophila) gene                                                 | 24.80                 | 0.61     | 40.88                   |
| ENSMUSG00000024991 | <i>Eif3a</i>         | Eukaryotic translation initiation factor 3, subunit A gene                           | 31.50                 | 0.79     | 39.74                   |
| ENSMUSG00000064070 | <i>2810051F02Rik</i> | RIKEN cdna 2810051F02 gene gene                                                      | 5.97                  | 0.15     | 38.82                   |
| ENSMUSG00000034088 | <i>Hdlbp</i>         | High density lipoprotein (HDL) binding protein gene                                  | 36.52                 | 0.95     | 38.64                   |
| ENSMUSG00000050071 | <i>Bex1</i>          | Brain expressed X-linked 2 gene                                                      | 81.97                 | 2.24     | 36.61                   |
| ENSMUSG00000058470 | <i>AC114657.9</i>    |                                                                                      | 6.32                  | 0.17     | 36.46                   |
| ENSMUSG00000019943 | <i>Atp2b1</i>        | Atpase, Ca++ transporting, plasma membrane 1 gene                                    | 20.29                 | 0.56     | 36.42                   |
| ENSMUSG00000021303 | <i>Gng4</i>          | Guanine nucleotide binding protein (G protein), gamma 4 gene                         | 12.52                 | 0.35     | 36.12                   |
| ENSMUSG00000054728 | <i>Phactr1</i>       | Phosphatase and actin regulator 1 gene                                               | 12.10                 | 0.34     | 35.32                   |
| ENSMUSG00000022469 | <i>Rapgef3</i>       | Rap guanine nucleotide exchange factor (GEF) 3 gene                                  | 20.91                 | 0.60     | 35.10                   |
| ENSMUSG00000026163 | <i>Sphkap</i>        | SPHK1 interactor, AKAP domain containing gene                                        | 10.77                 | 0.31     | 34.92                   |
| ENSMUSG00000021268 | <i>Meg3</i>          | Maternally expressed 3 gene                                                          | 28.37                 | 0.81     | 34.86                   |
| ENSMUSG00000038095 | <i>Sbno1</i>         | Sno, strawberry notch homologue 1 (Drosophila) gene                                  | 49.47                 | 1.46     | 33.95                   |
| ENSMUSG00000021807 | <i>2700060E02Rik</i> | RIKEN cdna 2700060E02 gene gene                                                      | 60.96                 | 1.81     | 33.68                   |
| ENSMUSG00000068615 | <i>Gjd2</i>          | Gap junction protein, delta 2 gene                                                   | 19.97                 | 0.59     | 33.59                   |
| ENSMUSG00000026020 | <i>Nol5</i>          | Nucleolar protein 5 gene                                                             | 11.98                 | 0.36     | 33.54                   |
| ENSMUSG00000029227 | <i>Fip111</i>        | FIP1 like 1 (S. Cerevisiae) gene                                                     | 64.13                 | 1.97     | 32.57                   |
| ENSMUSG00000021587 | <i>Pcsk1</i>         | Proprotein convertase subtilisin/kexin type 1 gene                                   | 20.82                 | 0.64     | 32.37                   |
| ENSMUSG00000040136 | <i>Abcc8</i>         | ATP-binding cassette, sub-family C (CFTR/MRP), member 8 gene                         | 19.26                 | 0.60     | 32.21                   |
| ENSMUSG00000040586 | <i>Ofd1</i>          | Oral-facial-digital syndrome 1 gene homologue (human) gene                           | 8.87                  | 0.28     | 31.91                   |
| ENSMUSG00000005373 | <i>Mlxipl</i>        | MLX interacting protein-like gene                                                    | 27.54                 | 0.87     | 31.78                   |
| ENSMUSG00000027220 | <i>Syt13</i>         | Synaptotagmin XIII gene                                                              | 13.38                 | 0.43     | 31.25                   |
| ENSMUSG00000030683 | <i>Sez6l2</i>        | Seizure related 6 homologue like 2 gene                                              | 16.85                 | 0.55     | 30.89                   |
| ENSMUSG00000029004 | <i>Mll5</i>          | Myeloid/lymphoid or mixed-lineage leukemia 5 gene                                    | 12.99                 | 0.43     | 30.27                   |
| ENSMUSG00000042258 | <i>Isl1</i>          | ISL1 transcription factor, LIM/homeodomain gene                                      | 30.93                 | 1.02     | 30.20                   |
| ENSMUSG00000031229 | <i>Atrx</i>          | Alpha thalassemia/mental retardation syndrome X-linked homologue (human) gene        | 11.08                 | 0.37     | 30.17                   |
| ENSMUSG00000024044 | <i>Epb4.1l3</i>      | Erythrocyte protein band 4.1-like 3 gene                                             | 11.98                 | 0.40     | 29.73                   |
| ENSMUSG00000037625 | <i>Cldn11</i>        | Claudin 11 gene                                                                      | 8.90                  | 0.30     | 29.44                   |
| ENSMUSG00000038774 | <i>Ascc3</i>         | Activating signal cointegrator 1 complex subunit 3 gene                              | 7.16                  | 0.24     | 29.25                   |
| ENSMUSG00000055022 | <i>Cntn1</i>         | Contactin 1 gene                                                                     | 10.49                 | 0.36     | 29.18                   |
| ENSMUSG00000075020 | <i>E530001K10Rik</i> | RIKEN cdna E530001K10 gene gene                                                      | 9.08                  | 0.32     | 28.56                   |
| ENSMUSG00000005268 | <i>Prlr</i>          | Prolactin receptor gene                                                              | 10.63                 | 0.38     | 27.83                   |

| Ensemble gene      | Gene                 |                                                                                               | Relative fluorescence |          |                         |
|--------------------|----------------------|-----------------------------------------------------------------------------------------------|-----------------------|----------|-------------------------|
|                    | Symbol               | Description                                                                                   | Islets                | Pancreas | Ratio (islets:pancreas) |
| ENSMUSG00000021488 | <i>Nsd1</i>          | Nuclear receptor-binding SET-domain protein 1 gene                                            | 14.70                 | 0.53     | 27.60                   |
| ENSMUSG00000026347 | <i>Tmem163</i>       | Transmembrane protein 163 gene                                                                | 9.10                  | 0.33     | 27.31                   |
| ENSMUSG00000042133 | <i>Ppig</i>          | Peptidyl-prolyl isomerase G (cyclophilin G) gene                                              | 14.06                 | 0.52     | 27.24                   |
| ENSMUSG00000030785 | <i>Cox6a2</i>        | Cytochrome c oxidase, subunit VI a, polypeptide 2 gene                                        | 13.81                 | 0.52     | 26.80                   |
| ENSMUSG00000003814 | <i>Calr</i>          | Calreticulin gene                                                                             | 341.15                | 12.81    | 26.64                   |
| ENSMUSG00000056219 | <i>AC155941.3</i>    |                                                                                               | 7.47                  | 0.28     | 26.61                   |
| ENSMUSG00000004360 | <i>AC153912.8</i>    |                                                                                               | 6.99                  | 0.26     | 26.60                   |
| ENSMUSG00000031600 | <i>Vps37a</i>        | Vacuolar protein sorting 37A (yeast) gene                                                     | 42.74                 | 1.62     | 26.40                   |
| ENSMUSG00000028820 | <i>Sfpq</i>          | Splicing factor proline/glutamine rich (polypyrimidine tract binding protein associated) gene | 103.85                | 3.95     | 26.27                   |
| ENSMUSG00000024899 | <i>Papss2</i>        | 3'-phosphoadenosine 5'-phosphosulfate synthase 2 gene                                         | 12.48                 | 0.48     | 26.25                   |
| ENSMUSG00000015401 | <i>Tmem27</i>        | Transmembrane protein 27 gene                                                                 | 101.37                | 3.86     | 26.23                   |
| ENSMUSG00000006335 | <i>Tfpt</i>          | TCF3 (E2A) fusion partner gene                                                                | 25.69                 | 1.00     | 25.64                   |
| ENSMUSG00000032030 | <i>Cul5</i>          | Cullin 5 gene                                                                                 | 28.75                 | 1.12     | 25.60                   |
| ENSMUSG00000027419 | <i>Pcsk2</i>         | Proprotein convertase subtilisin/kexin type 2 gene                                            | 31.94                 | 1.25     | 25.55                   |
| ENSMUSG00000033061 | <i>Resp18</i>        | Regulated endocrine-specific protein 18 gene                                                  | 48.66                 | 1.92     | 25.35                   |
| ENSMUSG00000071478 | <i>Hist1h2ad</i>     | Histone cluster 1, h2ad gene                                                                  | 11.72                 | 0.47     | 25.02                   |
| ENSMUSG00000033740 | <i>St18</i>          | Suppression of tumorigenicity 18 gene                                                         | 7.63                  | 0.31     | 24.95                   |
| ENSMUSG00000058569 | <i>Tmed9</i>         | Transmembrane emp24 protein transport domain containing 9 gene                                | 172.88                | 7.05     | 24.53                   |
| ENSMUSG00000026987 | <i>Baz2b</i>         | Bromodomain adjacent to zinc finger domain, 2B gene                                           | 15.60                 | 0.64     | 24.43                   |
| ENSMUSG00000043388 | <i>Tmem130</i>       | Transmembrane protein 130 gene                                                                | 15.91                 | 0.65     | 24.32                   |
| ENSMUSG00000068617 | <i>Efcab1</i>        | EF hand calcium binding domain 1 gene                                                         | 9.48                  | 0.40     | 23.84                   |
| ENSMUSG00000031696 | <i>Vps35</i>         | Vacuolar protein sorting 35 gene                                                              | 12.40                 | 0.52     | 23.81                   |
| ENSMUSG00000067219 | <i>Npal1</i>         | NIPA-like domain containing 1 gene                                                            | 9.23                  | 0.41     | 22.78                   |
| ENSMUSG00000029992 | <i>Gfpt1</i>         | Glutamine fructose-6-phosphate transaminase 1 gene                                            | 7.98                  | 0.35     | 22.74                   |
| ENSMUSG00000028514 | <i>Usp24</i>         | Ubiquitin specific peptidase 24 gene                                                          | 4.02                  | 0.18     | 22.40                   |
| ENSMUSG00000027177 | <i>Hipk3</i>         | Homeodomain interacting protein kinase 3 gene                                                 | 8.25                  | 0.37     | 22.33                   |
| ENSMUSG00000043518 | <i>Rai2</i>          | Retinoic acid induced 2 gene                                                                  | 18.66                 | 0.85     | 22.06                   |
| ENSMUSG00000044676 | <i>Zfp612</i>        | Zinc finger protein 612 gene                                                                  | 23.62                 | 1.07     | 22.00                   |
| ENSMUSG00000025788 | <i>AC154883.13</i>   | Putative uncharacterized protein                                                              | 12.62                 | 0.58     | 21.91                   |
| ENSMUSG00000058672 | <i>Tubb2a</i>        | Tubulin, beta 2a gene                                                                         | 78.30                 | 3.63     | 21.54                   |
| ENSMUSG00000073530 | <i>Pappa2</i>        | Pappalysin 2 gene                                                                             | 9.04                  | 0.42     | 21.28                   |
| ENSMUSG00000040035 | <i>Disp2</i>         | Dispatched homologue 2 (Drosophila) gene                                                      | 8.82                  | 0.42     | 20.76                   |
| ENSMUSG00000070471 | <i>AC119873.38</i>   |                                                                                               | 4.59                  | 0.22     | 20.73                   |
| ENSMUSG00000038884 | <i>A230050P20Rik</i> | RIKEN cdna A230050P20 gene gene                                                               | 11.62                 | 0.57     | 20.57                   |

| Ensemble gene      | Gene                   |                                                                            | Relative fluorescence |          |                         |
|--------------------|------------------------|----------------------------------------------------------------------------|-----------------------|----------|-------------------------|
|                    | Symbol                 | Description                                                                | Islets                | Pancreas | Ratio (islets:pancreas) |
| ENSMUSG00000028445 | <i>2310040A07Rik</i>   | RIKEN cdna 2310040A07 gene gene                                            | 11.86                 | 0.58     | 20.34                   |
| ENSMUSG00000020086 | <i>H2afy2</i>          | H2A histone family, member Y2 gene                                         | 8.74                  | 0.43     | 20.32                   |
| ENSMUSG00000054423 | <i>Cadps</i>           | Ca2+-dependent secretion activator gene                                    | 3.53                  | 0.18     | 20.05                   |
| ENSMUSG00000073019 | <i>AL669964.18-202</i> | Putative uncharacterized protein                                           | 14.93                 | 0.77     | 19.38                   |
| ENSMUSG00000005232 | <i>G6pc2</i>           | Glucose-6-phosphatase, catalytic, 2 gene                                   | 127.71                | 6.70     | 19.06                   |
| ENSMUSG00000005640 | <i>Insrr</i>           | Insulin receptor-related receptor gene                                     | 7.54                  | 0.40     | 18.91                   |
| ENSMUSG00000031284 | <i>Pak3</i>            | P21 (CDKN1A)-activated kinase 3 gene                                       | 5.31                  | 0.28     | 18.88                   |
| ENSMUSG00000037852 | <i>Cpe</i>             | Carboxypeptidase E gene                                                    | 432.12                | 23.07    | 18.73                   |
| ENSMUSG00000005233 | <i>Spc25</i>           | SPC25, NDC80 kinetochore complex component, homologue (S. Cerevisiae) gene | 39.19                 | 2.10     | 18.63                   |
| ENSMUSG00000057246 | <i>Tesb</i>            | Testis specific basic protein gene                                         | 6.61                  | 0.36     | 18.60                   |
| ENSMUSG00000035569 | <i>Ankrd11</i>         | Ankyrin repeat domain 11 gene                                              | 18.09                 | 0.98     | 18.56                   |
| ENSMUSG00000022141 | <i>Nipbl</i>           | Nipped-B homologue (Drosophila) gene                                       | 16.67                 | 0.92     | 18.16                   |
| ENSMUSG00000040387 | <i>Klhl32</i>          | Kelch-like 32 (Drosophila) gene                                            | 8.03                  | 0.44     | 18.16                   |
| ENSMUSG00000024261 | <i>Syt4</i>            | Synaptotagmin IV gene                                                      | 11.17                 | 0.62     | 18.16                   |
| ENSMUSG00000072501 | <i>Phf20l1</i>         | PHD finger protein 20-like 1 gene                                          | 24.75                 | 1.37     | 18.10                   |
| ENSMUSG00000032221 | <i>Mns1</i>            | Meiosis-specific nuclear structural protein 1 gene                         | 6.57                  | 0.37     | 17.97                   |
| ENSMUSG00000061601 | <i>Pclo</i>            | Piccolo (presynaptic cytomatrix protein) gene                              | 1.90                  | 0.11     | 17.67                   |
| ENSMUSG00000000184 | <i>Ccnd2</i>           | Cyclin D2 gene                                                             | 59.99                 | 3.44     | 17.43                   |
| ENSMUSG00000024122 | <i>Pdpk1</i>           | 3-phosphoinositide dependent protein kinase-1 gene                         | 11.34                 | 0.66     | 17.29                   |
| ENSMUSG00000022479 | <i>Vdr</i>             | Vitamin D receptor gene                                                    | 10.23                 | 0.59     | 17.20                   |
| ENSMUSG00000031010 | <i>Usp9x</i>           | Ubiquitin specific peptidase 9, X chromosome gene                          | 26.21                 | 1.54     | 17.04                   |
| ENSMUSG00000035187 | <i>Nkx6-1</i>          | NK6 homeobox 1 gene                                                        | 19.25                 | 1.13     | 17.02                   |
| ENSMUSG00000031327 | <i>Chic1</i>           | Cysteine-rich hydrophobic domain 1 gene                                    | 4.37                  | 0.26     | 16.84                   |
| ENSMUSG00000019917 | <i>Sep.10</i>          | Septin 10 gene                                                             | 5.72                  | 0.34     | 16.62                   |
| ENSMUSG00000071567 | <i>A830039N20Rik</i>   | RIKEN cdna A830039N20 gene gene                                            | 3.54                  | 0.21     | 16.49                   |
| ENSMUSG00000071354 | <i>2410022M11Rik</i>   | RIKEN cdna 2410022M11 gene gene                                            | 33.52                 | 2.04     | 16.47                   |
| ENSMUSG00000006651 | <i>Aplp1</i>           | Amyloid beta (A4) precursor-like protein 1 gene                            | 25.87                 | 1.58     | 16.42                   |
| ENSMUSG00000029591 | <i>Ung</i>             | Uracil DNA glycosylase gene                                                | 17.59                 | 1.07     | 16.40                   |
| ENSMUSG00000009246 | <i>Trpm5</i>           | Transient receptor potential cation channel, subfamily M, member 5 gene    | 5.67                  | 0.35     | 16.31                   |
| ENSMUSG00000045382 | <i>Cxcr4</i>           | Chemokine (C-X-C motif) receptor 4 gene                                    | 4.18                  | 0.26     | 16.28                   |
| ENSMUSG00000031428 | <i>Zcchc18</i>         | Zinc finger, CCHC domain containing 18 gene                                | 10.15                 | 0.63     | 16.23                   |
| ENSMUSG00000029919 | <i>Ptgds2</i>          | Prostaglandin D2 synthase 2, hematopoietic gene                            | 4.89                  | 0.30     | 16.12                   |
| ENSMUSG00000031095 | <i>Cul4b</i>           | Cullin 4B gene                                                             | 17.58                 | 1.10     | 15.95                   |

| Ensemble gene      | Gene                 |                                                                                          | Relative fluorescence |          |                         |
|--------------------|----------------------|------------------------------------------------------------------------------------------|-----------------------|----------|-------------------------|
|                    | Symbol               | Description                                                                              | Islets                | Pancreas | Ratio (islets:pancreas) |
| ENSMUSG00000021999 | <i>Cpb2</i>          | Carboxypeptidase B2 (plasma) gene                                                        | 6.33                  | 0.40     | 15.80                   |
| ENSMUSG00000071234 | <i>Tmem90a</i>       | Transmembrane protein 90a gene                                                           | 10.21                 | 0.65     | 15.77                   |
| ENSMUSG00000024298 | <i>9030612M13Rik</i> | RIKEN cdna 9030612M13 gene gene                                                          | 8.38                  | 0.54     | 15.66                   |
| ENSMUSG00000000686 | <i>1300007F04Rik</i> | RIKEN cdna 1300007F04 gene gene                                                          | 3.54                  | 0.23     | 15.59                   |
| ENSMUSG00000030180 | <i>Jarid1a</i>       | Jumonji, AT rich interactive domain 1A (Rbp2 like) gene                                  | 3.78                  | 0.24     | 15.56                   |
| ENSMUSG00000023927 | <i>Satb1</i>         | Special AT-rich sequence binding protein 1 gene                                          | 3.85                  | 0.25     | 15.39                   |
| ENSMUSG00000041608 | <i>Entpd3</i>        | Ectonucleoside triphosphate diphosphohydrolase 3 gene                                    | 6.01                  | 0.39     | 15.26                   |
| ENSMUSG00000004267 | <i>Eno2</i>          | Enolase 2, gamma neuronal gene                                                           | 9.12                  | 0.61     | 15.04                   |
| ENSMUSG00000043920 | <i>AC157657.2</i>    |                                                                                          | 15.45                 | 1.03     | 15.03                   |
| ENSMUSG00000044933 | <i>Sstr3</i>         | Somatostatin receptor 3 gene                                                             | 5.64                  | 0.38     | 14.99                   |
| ENSMUSG00000028906 | <i>Epb4.1</i>        | Erythrocyte protein band 4.1 gene                                                        | 12.00                 | 0.80     | 14.98                   |
| ENSMUSG00000041528 | <i>Rnf123</i>        | Ring finger protein 123 gene                                                             | 10.72                 | 0.72     | 14.92                   |
| ENSMUSG00000067851 | <i>Arfgef1</i>       | ADP-ribosylation factor guanine nucleotide-exchange factor 1(brefeldin A-inhibited) gene | 6.28                  | 0.43     | 14.62                   |
| ENSMUSG00000019796 | <i>Lrp11</i>         | Low density lipoprotein receptor-related protein 11 gene                                 | 11.18                 | 0.77     | 14.56                   |
| ENSMUSG00000033715 | <i>Akr1c14</i>       | Aldo-keto reductase family 1, member C14 gene                                            | 17.66                 | 1.22     | 14.49                   |
| ENSMUSG00000042446 | <i>Znym4</i>         | Zinc finger, MYM-type 4 gene                                                             | 7.76                  | 0.54     | 14.46                   |
| ENSMUSG00000068154 | <i>Insm1</i>         | Insulinoma-associated 1 gene                                                             | 9.63                  | 0.67     | 14.44                   |
| ENSMUSG00000020048 | <i>Hsp90b1</i>       | Heat shock protein 90, beta (Grp94), member 1 gene                                       | 136.51                | 9.52     | 14.34                   |
| ENSMUSG00000024002 | <i>Brd4</i>          | Bromodomain containing 4 gene                                                            | 11.15                 | 0.79     | 14.09                   |
| ENSMUSG00000042249 | <i>Adrbk2</i>        | Adrenergic receptor kinase, beta 2 gene                                                  | 3.46                  | 0.25     | 14.06                   |
| ENSMUSG00000023387 | <i>AC159106.3</i>    |                                                                                          | 11.15                 | 0.80     | 13.93                   |
| ENSMUSG00000032621 | <i>Sfrs12</i>        | Splicing factor, arginine/serine-rich 12 gene                                            | 10.92                 | 0.79     | 13.90                   |
| ENSMUSG00000023039 | <i>Krt7</i>          | Keratin 7 gene                                                                           | 8.96                  | 0.65     | 13.89                   |
| ENSMUSG00000020863 | <i>3300001P08Rik</i> | RIKEN cdna 3300001P08 gene gene                                                          | 72.09                 | 5.23     | 13.77                   |
| ENSMUSG00000045284 | <i>Wdr40b</i>        | WD repeat domain 40B gene                                                                | 4.60                  | 0.33     | 13.76                   |
| ENSMUSG00000031119 | <i>Gpc4</i>          | Glypican 4 gene                                                                          | 43.19                 | 3.14     | 13.75                   |
| ENSMUSG00000069769 | <i>Msi2</i>          | Musashi homologue 2 (Drosophila) gene                                                    | 8.59                  | 0.64     | 13.52                   |
| ENSMUSG00000044748 | <i>Defb1</i>         | Defensin beta 1 gene                                                                     | 15.90                 | 1.18     | 13.49                   |
| ENSMUSG00000041328 | <i>Pcf11</i>         | Cleavage and polyadenylation factor subunit homologue (S. Cerevisiae) gene               | 10.51                 | 0.78     | 13.42                   |
| ENSMUSG00000040225 | <i>Bat2d</i>         | BAT2 domain containing 1 gene                                                            | 8.84                  | 0.66     | 13.40                   |
| ENSMUSG00000020661 | <i>Dnmt3a</i>        | DNA methyltransferase 3A gene                                                            | 8.24                  | 0.62     | 13.40                   |
| ENSMUSG00000039967 | <i>Zfp292</i>        | Zinc finger protein 292 gene                                                             | 3.42                  | 0.26     | 13.24                   |
| ENSMUSG00000028357 | <i>Kif12</i>         | Kinesin family member 12 gene                                                            | 6.99                  | 0.53     | 13.19                   |

| Ensemble gene      | Gene                 |                                                                                          | Relative fluorescence |          |                         |
|--------------------|----------------------|------------------------------------------------------------------------------------------|-----------------------|----------|-------------------------|
|                    | Symbol               | Description                                                                              | Islets                | Pancreas | Ratio (islets:pancreas) |
| ENSMUSG00000027952 | <i>Pmvk</i>          | Phosphomevalonate kinase gene                                                            | 7.05                  | 0.54     | 13.12                   |
| ENSMUSG00000042460 | <i>C1galt1</i>       | Core 1 synthase, glycoprotein-N-acetylgalactosamine 3-beta-galactosyltransferase, 1 gene | 16.91                 | 1.29     | 13.11                   |
| ENSMUSG00000026355 | <i>Mcm6</i>          | Minichromosome maintenance deficient 6 (MIS5 homolog, S. Pombe) (S. Cerevisiae) gene     | 9.20                  | 0.70     | 13.11                   |
| ENSMUSG00000021910 | <i>Nisch</i>         | Nischarin gene                                                                           | 13.05                 | 1.00     | 13.05                   |
| ENSMUSG00000043909 | <i>Trp53bp1</i>      | Transformation related protein 53 binding protein 1 gene                                 | 10.24                 | 0.79     | 13.02                   |
| ENSMUSG00000048779 | <i>P2ry6</i>         | Pyrimidinergic receptor P2Y, G-protein coupled, 6 gene                                   | 11.20                 | 0.86     | 13.00                   |
| ENSMUSG00000040928 | <i>S100pbp</i>       | S100P binding protein gene                                                               | 5.84                  | 0.45     | 12.96                   |
| ENSMUSG00000064061 | <i>Dzip3</i>         | DAZ interacting protein 3, zinc finger gene                                              | 4.74                  | 0.37     | 12.91                   |
| ENSMUSG00000039278 | <i>Pcsk1n</i>        | Proprotein convertase subtilisin/kexin type 1 inhibitor gene                             | 12.14                 | 0.94     | 12.89                   |
| ENSMUSG00000040297 | <i>A1848100</i>      | CA009_MOUSE Isoform 2 of Q8C341 - Mus musculus (Mouse)                                   | 4.94                  | 0.38     | 12.85                   |
| ENSMUSG00000035623 | <i>Rsf1</i>          | Remodeling and spacing factor 1 gene                                                     | 3.33                  | 0.26     | 12.80                   |
| ENSMUSG00000028795 | <i>Ccdc28b</i>       | Coiled coil domain containing 28B gene                                                   | 11.81                 | 0.93     | 12.74                   |
| ENSMUSG00000019838 | <i>Slc16a10</i>      | Solute carrier family 16 (monocarboxylic acid transporters), member 10 gene              | 3.19                  | 0.25     | 12.72                   |
| ENSMUSG00000031255 | <i>Sytl4</i>         | Synaptotagmin-like 4 gene                                                                | 14.62                 | 1.15     | 12.72                   |
| ENSMUSG00000020635 | <i>Fkbp1b</i>        | FK506 binding protein 1b gene                                                            | 14.95                 | 1.19     | 12.57                   |
| ENSMUSG00000058942 | <i>AC120391.6</i>    | Putative uncharacterized protein fragment                                                | 5.34                  | 0.43     | 12.51                   |
| ENSMUSG00000023236 | <i>Scg5</i>          | Secretogranin V gene                                                                     | 70.46                 | 5.66     | 12.45                   |
| ENSMUSG00000003031 | <i>Cdkn1b</i>        | Cyclin-dependent kinase inhibitor 1B gene                                                | 4.89                  | 0.39     | 12.42                   |
| ENSMUSG00000027801 | <i>Tm4sf4</i>        | Transmembrane 4 superfamily member 4 gene                                                | 46.48                 | 3.75     | 12.41                   |
| ENSMUSG00000034349 | <i>Smc4</i>          | Structural maintenance of chromosomes 4 gene                                             | 8.09                  | 0.65     | 12.41                   |
| ENSMUSG00000038902 | <i>Pogz</i>          | Pogo transposable element with ZNF domain gene                                           | 10.38                 | 0.84     | 12.39                   |
| ENSMUSG00000027893 | <i>Ahcy1l</i>        | S-adenosylhomocysteine hydrolase-like 1 gene                                             | 7.06                  | 0.57     | 12.28                   |
| ENSMUSG00000028989 | <i>Angptl7</i>       | Angiopietin-like 7 gene                                                                  | 13.09                 | 1.07     | 12.24                   |
| ENSMUSG00000025738 | <i>Fbxl16</i>        | F-box and leucine-rich repeat protein 16 gene                                            | 37.17                 | 3.07     | 12.11                   |
| ENSMUSG00000040009 | <i>Gnaz</i>          | Guanine nucleotide binding protein, alpha z subunit gene                                 | 10.26                 | 0.85     | 12.09                   |
| ENSMUSG00000036766 | <i>1810011H11Rik</i> | Delta/notch-like EGF-related receptor gene                                               | 5.57                  | 0.46     | 12.06                   |
| ENSMUSG00000056222 | <i>Spock1</i>        | Sparc/osteonectin, cwcv and kazal-like domains proteoglycan 1 gene                       | 4.87                  | 0.41     | 12.01                   |
| ENSMUSG00000043668 | <i>Tox3</i>          | TOX high mobility group box family member 3 gene                                         | 7.93                  | 0.66     | 12.00                   |
| ENSMUSG00000020788 | <i>Atp2a3</i>        | Atpase, Ca++ transporting, ubiquitous gene                                               | 8.12                  | 0.68     | 11.96                   |
| ENSMUSG00000042772 | <i>Smg7</i>          | Smg-7 homolog, nonsense mediated mrna decay factor (C. Elegans) gene                     | 18.65                 | 1.56     | 11.96                   |
| ENSMUSG00000029559 | <i>2210016L21Rik</i> | RIKEN cdna 2210016L21 gene gene                                                          | 11.46                 | 0.96     | 11.96                   |

| Ensemble gene      | Gene                 |                                                                                         | Relative fluorescence |          |                         |
|--------------------|----------------------|-----------------------------------------------------------------------------------------|-----------------------|----------|-------------------------|
|                    | Symbol               | Description                                                                             | Islets                | Pancreas | Ratio (islets:pancreas) |
| ENSMUSG00000010277 | <i>2610507B11Rik</i> | RIKEN cdna 2610507B11 gene gene                                                         | 3.57                  | 0.30     | 11.94                   |
| ENSMUSG00000027263 | <i>Tubgcp4</i>       | Tubulin, gamma complex associated protein 4 gene                                        | 8.61                  | 0.72     | 11.92                   |
| ENSMUSG00000030838 | <i>Ush1c</i>         | Usher syndrome 1C homologue (human) gene                                                | 7.46                  | 0.63     | 11.91                   |
| ENSMUSG00000022983 | <i>Sfrs15</i>        | Splicing factor, arginine/serine-rich 15 gene                                           | 10.78                 | 0.91     | 11.86                   |
| ENSMUSG00000021728 | <i>Emb</i>           | POU domain, class 6, transcription factor 1 gene                                        | 3.62                  | 0.31     | 11.84                   |
| ENSMUSG00000004366 | <i>Sst</i>           | Somatostatin gene                                                                       | 45.46                 | 3.85     | 11.82                   |
| ENSMUSG00000028869 | <i>Gnl2</i>          | Guanine nucleotide binding protein-like 2 (nucleolar) gene                              | 21.54                 | 1.83     | 11.78                   |
| ENSMUSG00000037608 | <i>Bclaf1</i>        | BCL2-associated transcription factor 1 gene                                             | 14.73                 | 1.25     | 11.75                   |
| ENSMUSG00000034297 | <i>Med13</i>         | Mediator complex subunit 13 gene                                                        | 9.26                  | 0.79     | 11.74                   |
| ENSMUSG00000034007 | <i>Scaper</i>        | S phase cyclin A-associated protein in the ER gene                                      | 4.95                  | 0.42     | 11.70                   |
| ENSMUSG00000052727 | <i>Mtap1b</i>        | Microtubule-associated protein 1B gene                                                  | 6.14                  | 0.53     | 11.63                   |
| ENSMUSG00000063142 | <i>Kcnma1</i>        | Potassium large conductance calcium-activated channel, subfamily M, alpha member 1 gene | 2.32                  | 0.20     | 11.59                   |
| ENSMUSG00000011382 | <i>Dhdh</i>          | Dihydrodiol dehydrogenase (dimeric) gene                                                | 6.01                  | 0.52     | 11.58                   |
| ENSMUSG00000014232 | <i>Cluap1</i>        | Clusterin associated protein 1 gene                                                     | 10.90                 | 0.94     | 11.57                   |
| ENSMUSG00000071551 | <i>Akr1c19</i>       | Aldo-keto reductase family 1, member C19 gene                                           | 5.91                  | 0.51     | 11.53                   |
| ENSMUSG00000031748 | <i>Gnao1</i>         | Guanine nucleotide binding protein, alpha O gene                                        | 3.35                  | 0.29     | 11.50                   |
| ENSMUSG00000021733 | <i>Slc4a7</i>        | Solute carrier family 4, sodium bicarbonate cotransporter, member 7 gene                | 3.18                  | 0.28     | 11.45                   |
| ENSMUSG00000072966 | <i>Gprasp2</i>       | G protein-coupled receptor associated sorting protein 2 gene                            | 3.42                  | 0.30     | 11.45                   |
| ENSMUSG00000027805 | <i>Pfn</i>           | Perforin 1 (pore forming protein) gene                                                  | 8.89                  | 0.79     | 11.25                   |
| ENSMUSG00000035545 | <i>Leng8</i>         | Leukocyte receptor cluster (LRC) member 8 gene                                          | 18.50                 | 1.65     | 11.24                   |
| ENSMUSG00000024513 | <i>Mbd2</i>          | Methyl-cpg binding domain protein 2 gene                                                | 32.79                 | 2.93     | 11.20                   |
| ENSMUSG00000027184 | <i>Caprin1</i>       | Cell cycle associated protein 1 gene                                                    | 8.16                  | 0.73     | 11.17                   |
| ENSMUSG00000039474 | <i>Wfs1</i>          | Wolfram syndrome 1 homologue (human) gene                                               | 43.45                 | 3.89     | 11.17                   |
| ENSMUSG00000039954 | <i>Stk32a</i>        | Serine/threonine kinase 32A gene                                                        | 11.01                 | 1.00     | 10.99                   |
| ENSMUSG00000046404 | <i>Yod1</i>          | YOD1 OTU deubiquitinating enzyme 1 homologue (S. Cerevisiae) gene                       | 13.53                 | 1.24     | 10.95                   |
| ENSMUSG00000031161 | <i>Hdac6</i>         | Histone deacetylase 6 gene                                                              | 12.56                 | 1.15     | 10.95                   |
| ENSMUSG00000020402 | <i>Vdac1</i>         | Voltage-dependent anion channel 1 gene                                                  | 295.13                | 27.01    | 10.92                   |
| ENSMUSG00000005198 | <i>Polr2a</i>        | Polymerase (RNA) II (DNA directed) polypeptide A gene                                   | 3.62                  | 0.33     | 10.87                   |
| ENSMUSG00000037736 | <i>Limch1</i>        | LIM and calponin homology domains 1 gene                                                | 3.37                  | 0.31     | 10.76                   |
| ENSMUSG00000048874 | <i>Phf3</i>          | PHD finger protein 3 gene                                                               | 3.90                  | 0.36     | 10.76                   |
| ENSMUSG00000040943 | <i>AC120398.10</i>   | TET2_MOUSE Isoform 2 of Q4JK59 - Mus musculus (Mouse)                                   | 16.27                 | 1.52     | 10.69                   |
| ENSMUSG00000048495 | <i>1110034B05Rik</i> | RIKEN cdna 1110034B05 gene gene                                                         | 14.82                 | 1.39     | 10.69                   |

| Ensemble gene      | Gene          |                                                                                    | Relative fluorescence |          |                         |
|--------------------|---------------|------------------------------------------------------------------------------------|-----------------------|----------|-------------------------|
|                    | Symbol        | Description                                                                        | Islets                | Pancreas | Ratio (islets:pancreas) |
| ENSMUSG00000034951 | <i>Cog7</i>   | Component of oligomeric golgi complex 7 gene                                       | 65.13                 | 6.12     | 10.63                   |
| ENSMUSG00000020732 | <i>Rab37</i>  | RAB37, member of RAS oncogene family gene                                          | 11.12                 | 1.05     | 10.62                   |
| ENSMUSG00000003469 | <i>Phyhip</i> | Phytanoyl-coa hydroxylase interacting protein gene                                 | 4.78                  | 0.45     | 10.61                   |
| ENSMUSG00000037306 | <i>Man1c1</i> | Mannosidase, alpha, class 1C, member 1 gene                                        | 3.26                  | 0.31     | 10.53                   |
| ENSMUSG00000021194 | <i>Chga</i>   | Chromogranin A gene                                                                | 258.99                | 24.73    | 10.47                   |
| ENSMUSG00000062604 | <i>Srpk2</i>  | Serine/arginine-rich protein specific kinase 2 gene                                | 4.03                  | 0.39     | 10.46                   |
| ENSMUSG00000030873 | <i>Scnn1b</i> | Sodium channel, nonvoltage-gated 1 beta gene                                       | 6.90                  | 0.66     | 10.46                   |
| ENSMUSG00000027865 | <i>Gdap2</i>  | Ganglioside-induced differentiation-associated-protein 2 gene                      | 2.99                  | 0.29     | 10.32                   |
| ENSMUSG00000025777 | <i>Gdap1</i>  | Ganglioside-induced differentiation-associated-protein 1 gene                      | 4.15                  | 0.40     | 10.26                   |
| ENSMUSG00000039470 | <i>Zdhhc2</i> | Zinc finger, DHHC domain containing 2 gene                                         | 6.82                  | 0.67     | 10.24                   |
| ENSMUSG00000023473 | <i>Celsr3</i> | Cadherin, EGF LAG seven-pass G-type receptor 3 (flamingo homolog, Drosophila) gene | 2.48                  | 0.24     | 10.20                   |
| ENSMUSG00000002413 | <i>Braf</i>   | Braf transforming gene gene                                                        | 2.79                  | 0.28     | 10.04                   |
| ENSMUSG00000063887 | <i>Nlgn1</i>  | Neuroigin 1 gene                                                                   | 6.74                  | 0.67     | 10.00                   |

The fluorescence intensities from islet and pancreas samples for each of the ~10,000 transcripts expressed were normalised to the median fluorescence intensity of the respective tissue sample (CHF,  $n=6$ ) and used for calculation of the ratio of relative intensities (islets:pancreas) as a measure of islet-enrichment
