# Supplementary material for: Diet-induced gene expression of isolated pancreatic islets from a polygenic mouse model of the metabolic syndrome
Source: PubMed Central journal article supplement — Diabetologia. 2009 Nov 10;53(2):309–20. doi: 10.1007/s00125-009-1576-4 (PMC2797618; doi:10.1007/s00125-009-1576-4), 2009-11-10
Supplement: 125_2009_1576_MOESM3_ESM.pdf [file 125_2009_1576_MOESM3_ESM.pdf]

## Electronic supplementary material

**ESM Table 3** The most depleted transcripts in pancreatic islets

| Ensemble gene      | Gene                 |                                                                  | Relative fluorescence |          |                         |
|--------------------|----------------------|------------------------------------------------------------------|-----------------------|----------|-------------------------|
|                    | Symbol               | Description                                                      | Islets                | Pancreas | Ratio (islets:pancreas) |
| ENSMUSG00000071519 | <i>Prss3</i>         | T-cell receptor beta, variable V20 gene                          | 0.37                  | 553.89   | 0.0007                  |
| ENSMUSG00000030954 | <i>Gp2</i>           | Glycoprotein 2 (zymogen granule membrane) gene                   | 1.02                  | 493.42   | 0.0021                  |
| ENSMUSG00000071356 | <i>Reg3b</i>         | Regenerating islet-derived 3 beta gene                           | 0.63                  | 268.01   | 0.0023                  |
| ENSMUSG00000029522 | <i>Pla2g1b</i>       | Phospholipase A2, group IB, pancreas gene                        | 1.07                  | 425.76   | 0.0025                  |
| ENSMUSG00000031919 | <i>Tmed6</i>         | Transmembrane emp24 protein transport domain containing 6 gene   | 0.75                  | 273.66   | 0.0027                  |
| ENSMUSG00000036781 | <i>Rps27l</i>        | Ribosomal protein S27-like gene                                  | 0.96                  | 348.94   | 0.0028                  |
| ENSMUSG00000024028 | <i>Tff2</i>          | Trefoil factor 2 (spasmolytic protein 1) gene                    | 1.29                  | 424.19   | 0.0030                  |
| ENSMUSG00000068341 | <i>Reg3d</i>         | Regenerating islet-derived 3 delta gene                          | 0.49                  | 156.50   | 0.0031                  |
| ENSMUSG00000030219 | <i>Erp27</i>         | Endoplasmic reticulum protein 27 gene                            | 0.25                  | 79.16    | 0.0031                  |
| ENSMUSG00000004821 | <i>1810008K16Rik</i> | RIKEN cdna 1810008K16 gene gene                                  | 0.39                  | 123.84   | 0.0032                  |
| ENSMUSG00000020051 | <i>Pah</i>           | Phenylalanine hydroxylase gene                                   | 0.50                  | 158.77   | 0.0032                  |
| ENSMUSG00000022878 | <i>Adipoq</i>        | Adiponectin, C1Q and collagen domain containing gene             | 0.25                  | 68.19    | 0.0037                  |
| ENSMUSG00000024747 | <i>Aldh1a7</i>       | Aldehyde dehydrogenase family 1, subfamily A2 gene               | 0.35                  | 94.69    | 0.0037                  |
| ENSMUSG00000024184 | <i>Pdia2</i>         | Protein disulfide isomerase associated 2 gene                    | 1.46                  | 349.15   | 0.0042                  |
| ENSMUSG00000040205 | <i>Cuzd1</i>         | CUB and zona pellucida-like domains 1 gene                       | 2.33                  | 540.24   | 0.0043                  |
| ENSMUSG00000026735 | <i>Ptf1a</i>         | Pancreas specific transcription factor, 1a gene                  | 0.35                  | 80.29    | 0.0044                  |
| ENSMUSG00000024661 | <i>Fth1</i>          | Ferritin heavy chain 1 gene                                      | 0.88                  | 186.64   | 0.0047                  |
| ENSMUSG00000006345 | <i>Ggt1</i>          | Gamma-glutamyltransferase 1 gene                                 | 0.48                  | 99.65    | 0.0048                  |
| ENSMUSG00000029193 | <i>Cckar</i>         | Cholecystokinin A receptor gene                                  | 0.72                  | 146.48   | 0.0049                  |
| ENSMUSG00000040016 | <i>Ptger3</i>        | Prostaglandin E receptor 3 (subtype EP3) gene                    | 0.38                  | 70.40    | 0.0053                  |
| ENSMUSG00000034139 | <i>Serpini2</i>      | Serine (or cysteine) peptidase inhibitor, clade I, member 2 gene | 1.35                  | 242.20   | 0.0056                  |
| ENSMUSG00000053279 | <i>Aldh1a1</i>       | Aldehyde dehydrogenase family 1, subfamily A1 gene               | 0.27                  | 48.51    | 0.0056                  |
| ENSMUSG00000058579 | <i>Ela2a</i>         | Elastase 2A gene                                                 | 5.70                  | 961.76   | 0.0059                  |
| ENSMUSG00000003380 | <i>Rabac1</i>        | Rab acceptor 1 (prenylated) gene                                 | 0.43                  | 69.91    | 0.0062                  |
| ENSMUSG00000062478 | <i>Ctrc</i>          | Chymotrypsin C (caldecrin) gene                                  | 3.96                  | 617.38   | 0.0064                  |
| ENSMUSG00000056329 | <i>1810010K12Rik</i> | RIKEN cdna 1810010K12 gene gene                                  | 0.28                  | 42.65    | 0.0065                  |
| ENSMUSG00000026818 | <i>Cel</i>           | Carboxyl ester lipase gene                                       | 6.41                  | 988.92   | 0.0065                  |
| ENSMUSG00000059654 | <i>Reg1</i>          | Regenerating islet-derived 1 gene                                | 4.24                  | 654.14   | 0.0065                  |

| Ensemble gene      | Gene                  |                                                                                                                     | Relative fluorescence |          |                         |
|--------------------|-----------------------|---------------------------------------------------------------------------------------------------------------------|-----------------------|----------|-------------------------|
|                    | Symbol                | Description                                                                                                         | Islets                | Pancreas | Ratio (islets:pancreas) |
| ENSMUSG00000031170 | <i>Slc38a5</i>        | Solute carrier family 38, member 5 gene                                                                             | 0.35                  | 51.25    | 0.0068                  |
| ENSMUSG00000066512 | <i>Klk1</i>           | Kallikrein 1-related peptidase b1 gene                                                                              | 2.32                  | 334.97   | 0.0069                  |
| ENSMUSG00000056054 | <i>S100a8</i>         | S100 calcium binding protein A8 (calgranulin A) gene                                                                | 0.24                  | 32.28    | 0.0073                  |
| ENSMUSG00000073433 | <i>Arhgdig</i>        | Rho GDP dissociation inhibitor (GDI) gamma gene                                                                     | 1.05                  | 142.32   | 0.0074                  |
| ENSMUSG00000066515 | <i>Klk1b4</i>         | Kallikrein 1-related peptidase b4 gene                                                                              | 0.19                  | 23.16    | 0.0081                  |
| ENSMUSG00000063903 | <i>AC124176.3-202</i> | Kallikrein-1 Precursor (EC 3.4.21.35)(Tissue kallikrein-6)(mgk-6)(Glandular kallikrein K1)(Renal kallikrein)(KAL-B) | 11.23                 | 1376.13  | 0.0082                  |
| ENSMUSG00000008540 | <i>Mgst1</i>          | Microsomal glutathione S-transferase 1 gene                                                                         | 0.44                  | 52.77    | 0.0083                  |
| ENSMUSG00000071553 | <i>Cpa2</i>           | Carboxypeptidase A2, pancreatic gene                                                                                | 6.89                  | 829.32   | 0.0083                  |
| ENSMUSG00000027199 | <i>Gatm</i>           | Glycine amidinotransferase (L-arginine:glycine amidinotransferase) gene                                             | 1.42                  | 151.21   | 0.0094                  |
| ENSMUSG00000036169 | <i>Sostdc1</i>        | Sclerostin domain containing 1 gene                                                                                 | 0.38                  | 38.32    | 0.0099                  |
| ENSMUSG00000021922 | <i>Itih4</i>          | Inter alpha-trypsin inhibitor, heavy chain 4 gene                                                                   | 0.35                  | 34.20    | 0.0103                  |
| ENSMUSG00000061780 | <i>Cfd</i>            | Complement factor D (adipsin) gene                                                                                  | 0.45                  | 42.72    | 0.0105                  |
| ENSMUSG00000019929 | <i>Dcn</i>            | Decorin gene                                                                                                        | 0.65                  | 55.75    | 0.0117                  |
| ENSMUSG00000039878 | <i>Slc39a5</i>        | Solute carrier family 39 (metal ion transporter), member 5 gene                                                     | 0.29                  | 24.47    | 0.0120                  |
| ENSMUSG00000074264 | <i>Amy1</i>           | Amylase 1, salivary gene                                                                                            | 0.74                  | 61.13    | 0.0120                  |
| ENSMUSG00000046352 | <i>Gjb2</i>           | Gap junction protein, beta 2 gene                                                                                   | 0.40                  | 32.73    | 0.0122                  |
| ENSMUSG00000031765 | <i>Mt1</i>            | Metallothionein 1 gene                                                                                              | 1.11                  | 90.94    | 0.0122                  |
| ENSMUSG00000002944 | <i>Cd36</i>           | CD36 antigen gene                                                                                                   | 0.42                  | 32.05    | 0.0130                  |
| ENSMUSG00000041351 | <i>Rap1gap</i>        | Rap1 gtpase-activating protein gene                                                                                 | 0.75                  | 55.69    | 0.0134                  |
| ENSMUSG00000021238 | <i>Aldh6a1</i>        | Aldehyde dehydrogenase family 6, subfamily A1 gene                                                                  | 0.59                  | 40.59    | 0.0145                  |
| ENSMUSG00000030763 | <i>Lcmt1</i>          | Leucine carboxyl methyltransferase 1 gene                                                                           | 1.15                  | 76.79    | 0.0150                  |
| ENSMUSG00000023140 | <i>Reg2</i>           | Regenerating islet-derived 2 gene                                                                                   | 8.11                  | 538.51   | 0.0151                  |
| ENSMUSG00000024659 | <i>Anxa1</i>          | Annexin A1 gene                                                                                                     | 0.35                  | 22.91    | 0.0151                  |
| ENSMUSG00000002769 | <i>Gnmt</i>           | Glycine N-methyltransferase gene                                                                                    | 0.49                  | 30.67    | 0.0161                  |
| ENSMUSG00000053898 | <i>Ech1</i>           | Enoyl coenzyme A hydratase 1, peroxisomal gene                                                                      | 1.87                  | 113.93   | 0.0164                  |
| ENSMUSG00000049404 | <i>Rarres1</i>        | Retinoic acid receptor responder (tazarotene induced) 1 gene                                                        | 0.30                  | 17.93    | 0.0165                  |
| ENSMUSG00000045091 | <i>Aqp12</i>          | Aquaporin 12 gene                                                                                                   | 0.43                  | 26.10    | 0.0166                  |
| ENSMUSG00000020309 | <i>Chac2</i>          | Chac, cation transport regulator homologue 2 (E. Coli) gene                                                         | 0.38                  | 23.03    | 0.0166                  |
| ENSMUSG00000029373 | <i>Pf4</i>            | Platelet factor 4 gene                                                                                              | 0.22                  | 12.93    | 0.0170                  |
| ENSMUSG00000010064 | <i>Slc38a3</i>        | Solute carrier family 38, member 3 gene                                                                             | 0.34                  | 19.21    | 0.0179                  |

| Ensemble gene      | Gene                 |                                                                                     | Relative fluorescence |          |                         |
|--------------------|----------------------|-------------------------------------------------------------------------------------|-----------------------|----------|-------------------------|
|                    | Symbol               | Description                                                                         | Islets                | Pancreas | Ratio (islets:pancreas) |
| ENSMUSG00000047843 | <i>Bri3</i>          | Brain protein I3 gene                                                               | 0.46                  | 25.04    | 0.0183                  |
| ENSMUSG00000019872 | <i>Smpdl3a</i>       | Sphingomyelin phosphodiesterase, acid-like 3A gene                                  | 0.92                  | 50.35    | 0.0184                  |
| ENSMUSG00000047517 | <i>Dmbt1</i>         | Deleted in malignant brain tumors 1 gene                                            | 11.15                 | 574.04   | 0.0194                  |
| ENSMUSG00000024150 | <i>Mcf2</i>          | Multiple coagulation factor deficiency 2 gene                                       | 1.93                  | 98.50    | 0.0196                  |
| ENSMUSG00000027637 | <i>1110008F13Rik</i> | RIKEN cdna 1110008F13 gene gene                                                     | 1.26                  | 62.40    | 0.0202                  |
| ENSMUSG00000023433 | <i>Ela3</i>          | Elastase 3, pancreatic gene                                                         | 25.76                 | 1242.56  | 0.0207                  |
| ENSMUSG00000039899 | <i>Fgl2</i>          | Fibrinogen-like protein 2 gene                                                      | 0.33                  | 15.69    | 0.0207                  |
| ENSMUSG00000014769 | <i>Psmb1</i>         | Proteasome (prosome, macropain) subunit, beta type 1 gene                           | 0.99                  | 46.29    | 0.0213                  |
| ENSMUSG00000008036 | <i>Ap2s1</i>         | Adaptor-related protein complex 2, sigma 1 subunit gene                             | 0.83                  | 37.68    | 0.0221                  |
| ENSMUSG00000019851 | <i>Perp</i>          | PERP, TP53 apoptosis effector gene                                                  | 0.70                  | 30.28    | 0.0230                  |
| ENSMUSG00000017344 | <i>Vtn</i>           | Vitronectin gene                                                                    | 1.30                  | 55.95    | 0.0232                  |
| ENSMUSG00000024503 | <i>Spink3</i>        | Serine peptidase inhibitor, Kazal type 3 gene                                       | 15.48                 | 665.49   | 0.0233                  |
| ENSMUSG00000006333 | <i>Rps9</i>          | Ribosomal protein S9 gene                                                           | 5.45                  | 230.92   | 0.0236                  |
| ENSMUSG00000003355 | <i>Fkbp11</i>        | FK506 binding protein 11 gene                                                       | 2.65                  | 109.37   | 0.0242                  |
| ENSMUSG00000024085 | <i>Man2a1</i>        | Mannosidase 2, alpha 1 gene                                                         | 0.80                  | 31.66    | 0.0252                  |
| ENSMUSG00000026095 | <i>Asnsd1</i>        | Asparagine synthetase domain containing 1 gene                                      | 0.96                  | 37.84    | 0.0253                  |
| ENSMUSG00000007888 | <i>Crlf1</i>         | Cytokine receptor-like factor 1 gene                                                | 0.30                  | 11.68    | 0.0253                  |
| ENSMUSG00000020467 | <i>Efemp1</i>        | Epidermal growth factor-containing fibulin-like extracellular matrix protein 1 gene | 0.34                  | 13.58    | 0.0254                  |
| ENSMUSG00000020053 | <i>Igf1</i>          | Insulin-like growth factor 1 gene                                                   | 0.36                  | 14.00    | 0.0257                  |
| ENSMUSG00000025732 | <i>9530058B02Rik</i> | RIKEN cdna 9530058B02 gene gene                                                     | 0.48                  | 18.26    | 0.0262                  |
| ENSMUSG00000034353 | <i>Ramp1</i>         | Receptor (calcitonin) activity modifying protein 1 gene                             | 0.24                  | 9.28     | 0.0263                  |
| ENSMUSG00000030157 | <i>Clec2d</i>        | C-type lectin domain family 2, member d gene                                        | 0.30                  | 11.46    | 0.0265                  |
| ENSMUSG00000058217 | <i>Mia1</i>          | Melanoma inhibitory activity 1 gene                                                 | 0.58                  | 21.34    | 0.0271                  |
| ENSMUSG00000022450 | <i>Ndufa6</i>        | NADH dehydrogenase (ubiquinone) 1 alpha subcomplex, 6 (B14) gene                    | 1.56                  | 57.31    | 0.0272                  |
| ENSMUSG00000069132 | <i>Nxph2</i>         | Neurexophilin 2 gene                                                                | 0.24                  | 8.62     | 0.0274                  |
| ENSMUSG00000041654 | <i>Slc39a11</i>      | Solute carrier family 39 (metal ion transporter), member 11 gene                    | 0.43                  | 15.51    | 0.0276                  |
| ENSMUSG00000025465 | <i>Echs1</i>         | Enoyl Coenzyme A hydratase, short chain, 1, mitochondrial gene                      | 0.61                  | 21.83    | 0.0277                  |
| ENSMUSG00000027559 | <i>Car3</i>          | Carbonic anhydrase 3 gene                                                           | 0.59                  | 21.01    | 0.0280                  |
| ENSMUSG00000026003 | <i>Acadl</i>         | Acyl-Coenzyme A dehydrogenase, long-chain gene                                      | 0.66                  | 23.41    | 0.0281                  |
| ENSMUSG00000023031 | <i>Ela1</i>          | Elastase 1, pancreatic gene                                                         | 21.90                 | 774.50   | 0.0283                  |

| Ensemble gene      | Gene<br>Symbol       | Description                                                                              | Relative fluorescence |          |                            |
|--------------------|----------------------|------------------------------------------------------------------------------------------|-----------------------|----------|----------------------------|
|                    |                      |                                                                                          | Islets                | Pancreas | Ratio<br>(islets:pancreas) |
| ENSMUSG00000039168 | <i>Dap</i>           | Death-associated protein gene                                                            | 1.35                  | 47.29    | 0.0285                     |
| ENSMUSG00000054446 | <i>Cpa1</i>          | Carboxypeptidase A1 gene                                                                 | 48.49                 | 1679.40  | 0.0289                     |
| ENSMUSG00000024143 | <i>Rhoq</i>          | Ras homologue gene family, member Q gene                                                 | 3.58                  | 122.30   | 0.0293                     |
| ENSMUSG00000022037 | <i>Clu</i>           | Clusterin gene                                                                           | 9.22                  | 311.99   | 0.0295                     |
| ENSMUSG00000020787 | <i>P2rx1</i>         | Purinergic receptor P2X, ligand-gated ion channel, 1 gene                                | 0.34                  | 11.33    | 0.0298                     |
| ENSMUSG00000025091 | <i>Pnliprp2</i>      | Pancreatic lipase-related protein 2 gene                                                 | 13.87                 | 459.58   | 0.0302                     |
| ENSMUSG00000032357 | <i>Tinag</i>         | Tubulointerstitial nephritis antigen gene                                                | 0.22                  | 7.11     | 0.0305                     |
| ENSMUSG00000047040 | <i>Atad4</i>         | Atpase family, AAA domain containing 4 gene                                              | 0.66                  | 21.52    | 0.0307                     |
| ENSMUSG00000026986 | <i>Hnmt</i>          | Histamine N-methyltransferase gene                                                       | 0.22                  | 7.12     | 0.0308                     |
| ENSMUSG00000026832 | <i>Pscdbp</i>        | Cytohesin 1 interacting protein gene                                                     | 0.26                  | 8.43     | 0.0309                     |
| ENSMUSG00000063275 | <i>Ptpla</i>         | Protein tyrosine phosphatase-like (proline instead of catalytic arginine), member a gene | 0.84                  | 26.76    | 0.0315                     |
| ENSMUSG00000015478 | <i>Rnf5</i>          | Ring finger protein 5 gene                                                               | 0.76                  | 23.98    | 0.0318                     |
| ENSMUSG00000041881 | <i>Ndufa7</i>        | NADH dehydrogenase (ubiquinone) 1 alpha subcomplex, 7 (B14.5a) gene                      | 0.73                  | 22.76    | 0.0322                     |
| ENSMUSG00000027333 | <i>Smox</i>          | Spermine oxidase gene                                                                    | 0.32                  | 9.92     | 0.0323                     |
| ENSMUSG00000002985 | <i>ApoE</i>          | Apolipoprotein E gene                                                                    | 0.50                  | 15.41    | 0.0323                     |
| ENSMUSG00000023074 | <i>Mospd1</i>        | Motile sperm domain containing 1 gene                                                    | 0.38                  | 11.65    | 0.0325                     |
| ENSMUSG00000036887 | <i>C1qa</i>          | Complement component 1, q subcomponent, alpha polypeptide gene                           | 0.30                  | 9.07     | 0.0326                     |
| ENSMUSG00000063713 | <i>Klk1b3</i>        | Kallikrein 1-related peptidase b3 gene                                                   | 0.31                  | 9.13     | 0.0335                     |
| ENSMUSG00000055044 | <i>Pdlim1</i>        | PDZ and LIM domain 1 (elfin) gene                                                        | 0.38                  | 11.26    | 0.0335                     |
| ENSMUSG00000015932 | <i>Dstn</i>          | Destrin gene                                                                             | 1.19                  | 35.24    | 0.0337                     |
| ENSMUSG00000020307 | <i>Cdc34</i>         | Cell division cycle 34 homologue (S. Cerevisiae) gene                                    | 1.28                  | 37.78    | 0.0340                     |
| ENSMUSG00000025481 | <i>1190003J15Rik</i> | RIKEN cdna 1190003J15 gene gene                                                          | 0.52                  | 15.10    | 0.0343                     |
| ENSMUSG00000036381 | <i>P2ry14</i>        | Purinergic receptor P2Y, G-protein coupled, 14 gene                                      | 0.34                  | 10.03    | 0.0343                     |
| ENSMUSG00000035896 | <i>Rnase1</i>        | Ribonuclease, rnase A family, 1 (pancreatic) gene                                        | 32.41                 | 941.30   | 0.0344                     |
| ENSMUSG00000044734 | <i>Serp1a</i>        | Serine (or cysteine) peptidase inhibitor, clade B, member 1a gene                        | 0.36                  | 10.41    | 0.0345                     |
| ENSMUSG00000042179 | <i>Pnliprp1</i>      | Pancreatic lipase related protein 1 gene                                                 | 25.79                 | 738.64   | 0.0349                     |
| ENSMUSG00000057103 | <i>Cml1</i>          | Camello-like 1 gene                                                                      | 0.61                  | 17.42    | 0.0350                     |
| ENSMUSG00000030017 | <i>Reg3g</i>         | Regenerating islet-derived 3 gamma gene                                                  | 0.31                  | 8.85     | 0.0351                     |
| ENSMUSG00000024907 | <i>Gal</i>           | Galanin gene                                                                             | 0.24                  | 6.97     | 0.0351                     |
| ENSMUSG00000066513 | <i>Klk1b5</i>        | Kallikrein 1-related peptidase b5 gene                                                   | 3.60                  | 101.50   | 0.0355                     |

| Ensemble gene      | Gene<br>Symbol    | Description                                                             | Relative fluorescence |          |                            |
|--------------------|-------------------|-------------------------------------------------------------------------|-----------------------|----------|----------------------------|
|                    |                   |                                                                         | Islets                | Pancreas | Ratio<br>(islets:pancreas) |
| ENSMUSG00000037254 | <i>Itih2</i>      | Inter-alpha trypsin inhibitor, heavy chain 2 gene                       | 0.34                  | 9.50     | 0.0357                     |
| ENSMUSG00000048706 | <i>D4Bwg0951e</i> | Uncharacterized protein c9orf150 homologue                              | 0.90                  | 24.92    | 0.0362                     |
| ENSMUSG00000067149 | <i>Igj</i>        | Immunoglobulin joining chain gene                                       | 2.44                  | 67.22    | 0.0363                     |
| ENSMUSG00000019762 | <i>Iyd</i>        | Iodotyrosine deiodinase gene                                            | 0.33                  | 8.96     | 0.0365                     |
| ENSMUSG00000021785 | <i>Ngly1</i>      | N-glycanase 1 gene                                                      | 1.19                  | 32.14    | 0.0372                     |
| ENSMUSG00000030802 | <i>Bckdk</i>      | Branched chain ketoacid dehydrogenase kinase gene                       | 2.08                  | 56.03    | 0.0372                     |
| ENSMUSG00000029066 | <i>Mrpl20</i>     | Mitochondrial ribosomal protein L20 gene                                | 0.80                  | 21.44    | 0.0374                     |
| ENSMUSG00000073411 | <i>H2-D1</i>      | Histocompatibility 2, Q region locus 2 gene                             | 2.11                  | 56.31    | 0.0374                     |
| ENSMUSG00000047112 | <i>AC124681.3</i> |                                                                         | 0.26                  | 6.63     | 0.0385                     |
| ENSMUSG00000056071 | <i>S100a7a</i>    | S100 calcium binding protein A7A gene                                   | 0.58                  | 14.95    | 0.0385                     |
| ENSMUSG00000002379 | <i>Ndufa11</i>    | NADH dehydrogenase (ubiquinone) 1 alpha subcomplex 11 gene              | 1.19                  | 30.94    | 0.0386                     |
| ENSMUSG00000022969 | <i>Il10rb</i>     | Interleukin 10 receptor, beta gene                                      | 0.54                  | 13.94    | 0.0388                     |
| ENSMUSG00000002416 | <i>Ndufb2</i>     | NADH dehydrogenase (ubiquinone) 1 beta subcomplex, 2 gene               | 1.59                  | 40.91    | 0.0390                     |
| ENSMUSG00000020015 | <i>Pctk2</i>      | PCTAIRE-motif protein kinase 2 gene                                     | 0.53                  | 13.32    | 0.0395                     |
| ENSMUSG00000001123 | <i>Lgals9</i>     | Lectin, galactose binding, soluble 9 gene                               | 0.39                  | 9.79     | 0.0400                     |
| ENSMUSG00000001707 | <i>Eef1e1</i>     | Eukaryotic translation elongation factor 1 epsilon 1 gene               | 0.49                  | 11.95    | 0.0406                     |
| ENSMUSG00000073481 | <i>Mosc2</i>      | MOCO sulphurase C-terminal domain containing 2 gene                     | 1.76                  | 43.10    | 0.0409                     |
| ENSMUSG00000002014 | <i>Ssr4</i>       | Signal sequence receptor, delta gene                                    | 10.46                 | 254.99   | 0.0410                     |
| ENSMUSG00000043252 | <i>Tmem64</i>     | Transmembrane protein 64 gene                                           | 1.19                  | 28.94    | 0.0410                     |
| ENSMUSG00000046008 | <i>Pnlip</i>      | Pancreatic lipase gene                                                  | 29.49                 | 715.72   | 0.0412                     |
| ENSMUSG00000030591 | <i>Psm8</i>       | Proteasome (prosome, macropain) 26S subunit, non-atpase, 8 gene         | 1.33                  | 32.00    | 0.0415                     |
| ENSMUSG00000023307 | <i>March5</i>     | Membrane-associated ring finger (C3HC4) 5 gene                          | 1.14                  | 27.26    | 0.0417                     |
| ENSMUSG00000024857 | <i>Cabp2</i>      | Calcium binding protein 2 gene                                          | 0.80                  | 19.23    | 0.0417                     |
| ENSMUSG00000051695 | <i>Pcbp1</i>      | Poly(rc) binding protein 1 gene                                         | 1.40                  | 33.55    | 0.0417                     |
| ENSMUSG00000030615 | <i>Tmem126a</i>   | Transmembrane protein 126A gene                                         | 1.82                  | 43.59    | 0.0418                     |
| ENSMUSG00000010911 | <i>Apip</i>       | APAF1 interacting protein gene                                          | 0.86                  | 20.49    | 0.0421                     |
| ENSMUSG00000025651 | <i>Uqcrc1</i>     | Ubiquinol-cytochrome c reductase core protein 1 gene                    | 0.94                  | 22.32    | 0.0421                     |
| ENSMUSG00000060376 | <i>Bckdha</i>     | Branched chain ketoacid dehydrogenase E1, alpha polypeptide gene        | 0.55                  | 13.09    | 0.0421                     |
| ENSMUSG00000001918 | <i>Slc1a5</i>     | Solute carrier family 1 (neutral amino acid transporter), member 5 gene | 0.42                  | 9.91     | 0.0428                     |
| ENSMUSG00000014856 | <i>Tmem208</i>    | Transmembrane protein 208 gene                                          | 2.23                  | 52.01    | 0.0429                     |
| ENSMUSG00000024538 | <i>Ppic</i>       | Peptidylprolyl isomerase C gene                                         | 1.57                  | 36.26    | 0.0432                     |

| Ensemble gene      | Gene<br>Symbol       | Description                                                                    | Relative fluorescence |          |                            |
|--------------------|----------------------|--------------------------------------------------------------------------------|-----------------------|----------|----------------------------|
|                    |                      |                                                                                | Islets                | Pancreas | Ratio<br>(islets:pancreas) |
| ENSMUSG00000020484 | <i>Xbp1</i>          | X-box binding protein 1 gene                                                   | 5.01                  | 115.68   | 0.0433                     |
| ENSMUSG00000020219 | <i>AC152413.5</i>    | Mitochondrial import inner membrane translocase subunit Tim13                  | 1.69                  | 38.83    | 0.0435                     |
| ENSMUSG00000060002 | <i>Chpt1</i>         | Choline phosphotransferase 1 gene                                              | 0.31                  | 7.04     | 0.0436                     |
| ENSMUSG00000038650 | <i>Rnh1</i>          | Ribonuclease/angiogenin inhibitor 1 gene                                       | 1.59                  | 36.12    | 0.0440                     |
| ENSMUSG00000052738 | <i>Suclg1</i>        | Succinate-coa ligase, GDP-forming, alpha subunit gene                          | 1.85                  | 42.14    | 0.0440                     |
| ENSMUSG00000019804 | <i>Snx3</i>          | Sorting nexin 3 gene                                                           | 2.71                  | 60.81    | 0.0445                     |
| ENSMUSG00000020372 | <i>Gnb2l1</i>        | Guanine nucleotide binding protein (G protein), beta polypeptide 2 like 1 gene | 17.68                 | 395.30   | 0.0447                     |
| ENSMUSG00000002395 | <i>Use1</i>          | Unconventional SNARE in the ER 1 homologue (S. Cerevisiae) gene                | 1.28                  | 28.26    | 0.0454                     |
| ENSMUSG00000035237 | <i>Lcat</i>          | Lecithin cholesterol acyltransferase gene                                      | 0.58                  | 12.82    | 0.0454                     |
| ENSMUSG00000030688 | <i>Stard10</i>       | START domain containing 10 gene                                                | 2.22                  | 48.56    | 0.0458                     |
| ENSMUSG00000039197 | <i>Adk</i>           | Adenosine kinase gene                                                          | 3.28                  | 71.39    | 0.0459                     |
| ENSMUSG00000020072 | <i>Pbld</i>          | Phenazine biosynthesis-like protein domain containing gene                     | 0.27                  | 5.77     | 0.0461                     |
| ENSMUSG00000042784 | <i>Muc1</i>          | Mucin 1, transmembrane gene                                                    | 0.33                  | 7.18     | 0.0462                     |
| ENSMUSG00000047797 | <i>Gjb1</i>          | Gap junction protein, beta 1 gene                                              | 0.23                  | 5.06     | 0.0462                     |
| ENSMUSG00000000058 | <i>Cav2</i>          | Caveolin 2 gene                                                                | 0.51                  | 11.13    | 0.0462                     |
| ENSMUSG00000049350 | <i>1810010M01Rik</i> | RIKEN cdna 1810010M01 gene gene                                                | 26.31                 | 560.10   | 0.0470                     |
| ENSMUSG00000040370 | <i>Lym5</i>          | LYR motif containing 5 gene                                                    | 0.57                  | 12.05    | 0.0470                     |
| ENSMUSG00000034758 | <i>Tle6</i>          | Transducin-like enhancer of split 6, homologue of Drosophila E(spl) gene       | 0.85                  | 17.80    | 0.0478                     |
| ENSMUSG00000032263 | <i>Bckdhb</i>        | Branched chain ketoacid dehydrogenase E1, beta polypeptide gene                | 0.70                  | 14.43    | 0.0482                     |
| ENSMUSG00000019173 | <i>Rab5c</i>         | RAB5C, member RAS oncogene family gene                                         | 0.79                  | 16.34    | 0.0482                     |
| ENSMUSG00000038080 | <i>Aof1</i>          | Amine oxidase, flavin containing 1 gene                                        | 0.64                  | 13.27    | 0.0483                     |
| ENSMUSG00000068220 | <i>Lgals1</i>        | Lectin, galactose binding, soluble 1 gene                                      | 7.97                  | 163.93   | 0.0486                     |
| ENSMUSG00000025393 | <i>Atp5b</i>         | ATP synthase, H+ transporting mitochondrial F1 complex, beta subunit gene      | 2.68                  | 54.04    | 0.0496                     |
| ENSMUSG00000029397 | <i>Rchyl</i>         | Ring finger and CHY zinc finger domain containing 1 gene                       | 0.86                  | 17.29    | 0.0497                     |
| ENSMUSG00000006299 | <i>Aamp</i>          | Angio-associated migratory protein gene                                        | 0.94                  | 18.94    | 0.0498                     |
| ENSMUSG00000041390 | <i>Mdfic</i>         | Myod family inhibitor domain containing gene                                   | 0.33                  | 6.53     | 0.0500                     |
| ENSMUSG00000030088 | <i>Aldh1l1</i>       | Aldehyde dehydrogenase 1 family, member L1 gene                                | 0.32                  | 6.33     | 0.0501                     |
| ENSMUSG00000050103 | <i>Tmem195</i>       | Transmembrane protein 195 gene                                                 | 0.24                  | 4.84     | 0.0501                     |
| ENSMUSG00000053565 | <i>Eif3k</i>         | Eukaryotic translation initiation factor 3, subunit K gene                     | 4.04                  | 79.85    | 0.0506                     |
| ENSMUSG00000045896 | <i>Paip2b</i>        | Poly(A) binding protein interacting protein 2B gene                            | 0.84                  | 16.49    | 0.0512                     |

| Ensemble gene      | Gene                      |                                                                                                                   | Relative fluorescence |          |                            |
|--------------------|---------------------------|-------------------------------------------------------------------------------------------------------------------|-----------------------|----------|----------------------------|
|                    | Symbol                    | Description                                                                                                       | Islets                | Pancreas | Ratio<br>(islets:pancreas) |
| ENSMUSG00000058135 | <i>Gstm1</i>              | Glutathione S-transferase, mu 1 gene                                                                              | 0.41                  | 7.92     | 0.0521                     |
| ENSMUSG00000038462 | <i>Uqcrrf1</i>            | Ubiquinol-cytochrome c reductase, Rieske iron-sulfur polypeptide 1 gene                                           | 1.32                  | 25.09    | 0.0525                     |
| ENSMUSG00000027109 | <i>Sp3</i>                | Trans-acting transcription factor 3 gene                                                                          | 0.44                  | 8.28     | 0.0527                     |
| ENSMUSG00000022270 | <i>1810015C04Rik</i>      | Family with sequence similarity 134, member B gene                                                                | 0.72                  | 13.59    | 0.0531                     |
| ENSMUSG00000026938 | <i>Fcna</i>               | Ficolin A gene                                                                                                    | 0.35                  | 6.51     | 0.0535                     |
| ENSMUSG00000029713 | <i>Gnb2</i>               | Guanine nucleotide binding protein (G protein), beta 2 gene                                                       | 0.65                  | 12.11    | 0.0536                     |
| ENSMUSG00000030087 | <i>Klf15</i>              | Kruppel-like factor 15 gene                                                                                       | 0.65                  | 12.10    | 0.0538                     |
| ENSMUSG00000065990 | <i>Aurkaip1</i>           | Aurora kinase A interacting protein 1 gene                                                                        | 2.11                  | 39.14    | 0.0539                     |
| ENSMUSG00000020098 | <i>Pcbd1</i>              | Pterin 4 alpha carbinolamine dehydratase/dimerization cofactor of hepatocyte nuclear factor 1 alpha (TCF1) 1 gene | 4.35                  | 80.61    | 0.0540                     |
| ENSMUSG00000021794 | <i>Glud1</i>              | Glutamate dehydrogenase 1 gene                                                                                    | 1.56                  | 28.43    | 0.0547                     |
| ENSMUSG00000069792 | <i>OTTMUSG00000000971</i> | Predicted gene, OTTMUSG00000000971 gene                                                                           | 0.40                  | 7.24     | 0.0550                     |
| ENSMUSG00000030560 | <i>Ctsc</i>               | Cathepsin C gene                                                                                                  | 1.89                  | 34.07    | 0.0556                     |
| ENSMUSG00000027215 | <i>Cd82</i>               | CD82 antigen gene                                                                                                 | 0.75                  | 13.21    | 0.0564                     |
| ENSMUSG00000020955 | <i>Ap4s1</i>              | Adaptor-related protein complex AP-4, sigma 1 gene                                                                | 0.32                  | 5.51     | 0.0574                     |
| ENSMUSG00000033416 | <i>1110038D17Rik</i>      | RIKEN cDNA 1110038D17 gene gene                                                                                   | 0.96                  | 16.66    | 0.0576                     |
| ENSMUSG00000054733 | <i>MsrA</i>               | Methionine sulfoxide reductase A gene                                                                             | 0.80                  | 13.86    | 0.0577                     |
| ENSMUSG00000006498 | <i>Ptbp1</i>              | Polypyrimidine tract binding protein 1 gene                                                                       | 1.67                  | 28.67    | 0.0583                     |
| ENSMUSG00000027937 | <i>Jtb</i>                | Jumping translocation breakpoint gene                                                                             | 6.77                  | 114.89   | 0.0589                     |
| ENSMUSG00000002332 | <i>Dhrs1</i>              | Dehydrogenase/reductase (SDR family) member 1 gene                                                                | 0.71                  | 12.06    | 0.0590                     |
| ENSMUSG00000021456 | <i>Fbp2</i>               | Fructose biphosphatase 2 gene                                                                                     | 0.36                  | 6.08     | 0.0590                     |
| ENSMUSG00000037206 | <i>Islr</i>               | Immunoglobulin superfamily containing leucine-rich repeat gene                                                    | 0.20                  | 3.32     | 0.0594                     |
| ENSMUSG00000006731 | <i>B4galnt1</i>           | Beta-1,4-N-acetyl-galactosaminyl transferase 1 gene                                                               | 0.49                  | 8.27     | 0.0596                     |
| ENSMUSG00000034112 | <i>Atp2c2</i>             | ATPase, Ca <sup>++</sup> transporting, type 2C, member 2 gene                                                     | 0.36                  | 6.08     | 0.0596                     |
| ENSMUSG00000040213 | <i>Ccbl2</i>              | Cysteine conjugate-beta lyase 2 gene                                                                              | 0.61                  | 10.14    | 0.0598                     |
| ENSMUSG00000003970 | <i>Rpl8</i>               | Ribosomal protein L8 gene                                                                                         | 17.78                 | 295.80   | 0.0601                     |
| ENSMUSG00000028167 | <i>Bdh2</i>               | 3-hydroxybutyrate dehydrogenase, type 2 gene                                                                      | 0.69                  | 11.30    | 0.0609                     |
| ENSMUSG00000030278 | <i>Cidec</i>              | Cell death-inducing DFFA-like effector c gene                                                                     | 0.37                  | 5.99     | 0.0611                     |
| ENSMUSG00000036446 | <i>Lum</i>                | Lumican gene                                                                                                      | 0.31                  | 5.05     | 0.0614                     |
| ENSMUSG00000036452 | <i>Arhgap26</i>           | Rho GTPase activating protein 26 gene                                                                             | 0.31                  | 5.09     | 0.0618                     |
| ENSMUSG00000011463 | <i>Cpb1</i>               | Carboxypeptidase B1 (tissue) gene                                                                                 | 52.58                 | 848.30   | 0.0620                     |

| Ensemble gene       | Gene                 |                                                                                     | Relative fluorescence |          |                         |
|---------------------|----------------------|-------------------------------------------------------------------------------------|-----------------------|----------|-------------------------|
|                     | Symbol               | Description                                                                         | Islets                | Pancreas | Ratio (islets:pancreas) |
| ENSMUSG00000039682  | <i>Lap3</i>          | Leucine aminopeptidase 3 gene                                                       | 0.63                  | 10.08    | 0.0622                  |
| ENSMUSG000000032554 | <i>Trf</i>           | Transferrin gene                                                                    | 0.38                  | 6.04     | 0.0623                  |
| ENSMUSG000000047061 | <i>Hsp25-ps1</i>     | Heat shock protein 25, pseudogene 1 Pseudogene                                      | 0.47                  | 7.61     | 0.0624                  |
| ENSMUSG000000030711 | <i>Sult1a1</i>       | Sulfotransferase family 1A, phenol-preferring, member 1 gene                        | 0.57                  | 9.07     | 0.0625                  |
| ENSMUSG000000032359 | <i>Ctsh</i>          | Cathepsin H gene                                                                    | 0.80                  | 12.63    | 0.0630                  |
| ENSMUSG000000053886 | <i>Sh2d4a</i>        | SH2 domain containing 4A gene                                                       | 0.65                  | 10.23    | 0.0632                  |
| ENSMUSG000000005575 | <i>Ube2m</i>         | Ubiquitin-conjugating enzyme E2M (UBC12 homolog, yeast) gene                        | 0.44                  | 6.99     | 0.0633                  |
| ENSMUSG000000031896 | <i>Ctrl</i>          | Chymotrypsin-like gene                                                              | 68.44                 | 1080.64  | 0.0633                  |
| ENSMUSG000000055114 | <i>AC152395.9</i>    |                                                                                     | 0.22                  | 3.48     | 0.0635                  |
| ENSMUSG000000062515 | <i>Fabp4</i>         | Fatty acid binding protein 4, adipocyte gene                                        | 7.36                  | 115.26   | 0.0638                  |
| ENSMUSG000000039640 | <i>Mrpl12</i>        | Mitochondrial ribosomal protein L12 gene                                            | 0.98                  | 15.31    | 0.0639                  |
| ENSMUSG000000059734 | <i>Ndufs8</i>        | NADH dehydrogenase (ubiquinone) Fe-S protein 8 gene                                 | 3.00                  | 46.84    | 0.0641                  |
| ENSMUSG000000025650 | <i>Col7a1</i>        | Collagen, type VII, alpha 1 gene                                                    | 0.47                  | 7.24     | 0.0646                  |
| ENSMUSG000000044485 | <i>Klk1b11</i>       | Kallikrein 1-related peptidase b11 gene                                             | 0.46                  | 7.04     | 0.0647                  |
| ENSMUSG000000012848 | <i>Rps5</i>          | Ribosomal protein S5 gene                                                           | 24.97                 | 382.88   | 0.0652                  |
| ENSMUSG000000074227 | <i>Spint2</i>        | Serine protease inhibitor, Kunitz type 2 gene                                       | 4.95                  | 75.54    | 0.0655                  |
| ENSMUSG000000031807 | <i>Pgls</i>          | 6-phosphogluconolactonase gene                                                      | 1.44                  | 21.92    | 0.0656                  |
| ENSMUSG000000019494 | <i>Cops6</i>         | COP9 (constitutive photomorphogenic) homolog, subunit 6 (Arabidopsis thaliana) gene | 1.27                  | 19.25    | 0.0661                  |
| ENSMUSG000000074170 | <i>Plekhf1</i>       | Pleckstrin homology domain containing, family F (with FYVE domain) member 1 gene    | 0.30                  | 4.59     | 0.0662                  |
| ENSMUSG000000030037 | <i>Mrpl53</i>        | Mitochondrial ribosomal protein L53 gene                                            | 0.85                  | 12.74    | 0.0664                  |
| ENSMUSG000000039960 | <i>Rhou</i>          | Ras homologue gene family, member U gene                                            | 1.51                  | 22.66    | 0.0666                  |
| ENSMUSG000000015837 | <i>Sqstm1</i>        | Sequestosome 1 gene                                                                 | 2.45                  | 36.73    | 0.0666                  |
| ENSMUSG000000052428 | <i>Tmco1</i>         | Transmembrane and coiled-coil domains 1 gene                                        | 1.61                  | 24.15    | 0.0667                  |
| ENSMUSG000000021771 | <i>Vdac2</i>         | Voltage-dependent anion channel 2 gene                                              | 9.12                  | 136.44   | 0.0668                  |
| ENSMUSG000000031818 | <i>Cox4i1</i>        | Cytochrome c oxidase subunit IV isoform 1 gene                                      | 13.43                 | 200.79   | 0.0669                  |
| ENSMUSG000000032578 | <i>Cish</i>          | Cytokine inducible SH2-containing protein gene                                      | 0.88                  | 13.08    | 0.0670                  |
| ENSMUSG000000032679 | <i>Cd59a</i>         | CD59a antigen gene                                                                  | 0.57                  | 8.45     | 0.0678                  |
| ENSMUSG000000047368 | <i>5730446C15Rik</i> | Family with sequence similarity 108, member B gene                                  | 1.25                  | 18.50    | 0.0678                  |
| ENSMUSG000000025144 | <i>Stra13</i>        | Basic helix-loop-helix domain containing, class B2 gene                             | 0.60                  | 8.78     | 0.0679                  |
| ENSMUSG000000063882 | <i>Uqcrh</i>         | Ubiquinol-cytochrome c reductase hinge protein gene                                 | 8.84                  | 130.05   | 0.0680                  |



| Ensemble gene      | Gene<br>Symbol     | Description                                                                                      | Relative fluorescence |          |                            |
|--------------------|--------------------|--------------------------------------------------------------------------------------------------|-----------------------|----------|----------------------------|
|                    |                    |                                                                                                  | Islets                | Pancreas | Ratio<br>(islets:pancreas) |
| ENSMUSG00000023883 | <i>Phf10</i>       | PHD finger protein 10 gene                                                                       | 1.71                  | 25.18    | 0.0681                     |
| ENSMUSG00000039016 | <i>Timm8b</i>      | Translocase of inner mitochondrial membrane 8 homologue b (yeast) gene                           | 1.39                  | 20.17    | 0.0688                     |
| ENSMUSG00000024608 | <i>Rps14</i>       | Ribosomal protein S14 gene                                                                       | 17.21                 | 249.85   | 0.0689                     |
| ENSMUSG00000073435 | <i>Nme3</i>        | Non-metastatic cells 3, protein expressed in gene                                                | 0.52                  | 7.52     | 0.0694                     |
| ENSMUSG00000021775 | <i>Nr1d2</i>       | Nuclear receptor subfamily 1, group D, member 2 gene                                             | 3.19                  | 45.77    | 0.0697                     |
| ENSMUSG00000031059 | <i>Ndufb11</i>     | NADH dehydrogenase (ubiquinone) 1 beta subcomplex, 11 gene                                       | 4.75                  | 67.91    | 0.0700                     |
| ENSMUSG00000003346 | <i>D10Bwg1364e</i> | Family with sequence similarity 108, member A gene                                               | 0.37                  | 5.32     | 0.0700                     |
| ENSMUSG00000030796 | <i>Tead2</i>       | TEA domain family member 2 gene                                                                  | 0.49                  | 7.01     | 0.0704                     |
| ENSMUSG00000000563 | <i>Atp5f1</i>      | ATP synthase, H <sup>+</sup> transporting, mitochondrial F0 complex, subunit b, isoform 1 gene   | 2.69                  | 38.18    | 0.0704                     |
| ENSMUSG00000026639 | <i>Lamb3</i>       | Laminin, beta 3 gene                                                                             | 0.33                  | 4.68     | 0.0705                     |
| ENSMUSG00000029229 | <i>Chic2</i>       | Cysteine-rich hydrophobic domain 2 gene                                                          | 3.20                  | 45.28    | 0.0707                     |
| ENSMUSG00000061838 | <i>Suclg2</i>      | Succinate-Coenzyme A ligase, GDP-forming, beta subunit gene                                      | 1.52                  | 21.41    | 0.0709                     |
| ENSMUSG00000016319 | <i>Slc25a5</i>     | Solute carrier family 25 (mitochondrial carrier, adenine nucleotide translocator), member 5 gene | 24.45                 | 343.73   | 0.0711                     |
| ENSMUSG00000030103 | <i>Bhlhb2</i>      | Basic helix-loop-helix domain containing, class B2 gene                                          | 0.42                  | 5.94     | 0.0711                     |
| ENSMUSG00000026712 | <i>Mrc1</i>        | Mannose receptor, C type 1 gene                                                                  | 0.33                  | 4.70     | 0.0712                     |
| ENSMUSG00000031897 | <i>Psmb10</i>      | Proteasome (prosome, macropain) subunit, beta type 10 gene                                       | 8.06                  | 112.40   | 0.0717                     |
| ENSMUSG00000023078 | <i>Cxcl13</i>      | Chemokine (C-X-C motif) ligand 13 gene                                                           | 0.52                  | 7.28     | 0.0717                     |
| ENSMUSG00000062054 | <i>Iah1</i>        | Isoamyl acetate-hydrolyzing esterase 1 homologue (S. Cerevisiae) gene                            | 0.72                  | 9.97     | 0.0719                     |
| ENSMUSG00000041828 | <i>Abca8a</i>      | ATP-binding cassette, sub-family A (ABC1), member 8a gene                                        | 0.76                  | 10.58    | 0.0720                     |
| ENSMUSG00000023046 | <i>Igfbp6</i>      | Insulin-like growth factor binding protein 6 gene                                                | 0.47                  | 6.44     | 0.0722                     |
| ENSMUSG00000004655 | <i>Aqp1</i>        | Aquaporin 1 gene                                                                                 | 0.29                  | 4.03     | 0.0722                     |
| ENSMUSG00000049775 | <i>Tmsb4x</i>      | Thymosin, beta 4, X chromosome gene                                                              | 31.60                 | 437.27   | 0.0723                     |
| ENSMUSG00000061286 | <i>Exosc5</i>      | Exosome component 5 gene                                                                         | 0.29                  | 4.04     | 0.0723                     |
| ENSMUSG00000016194 | <i>Hsd11b1</i>     | Hydroxysteroid 11-beta dehydrogenase 1 gene                                                      | 0.41                  | 5.63     | 0.0732                     |
| ENSMUSG00000062397 | <i>Zfp706</i>      | Zinc finger protein 706 gene                                                                     | 3.39                  | 46.20    | 0.0733                     |
| ENSMUSG00000001666 | <i>Ddt</i>         | D-dopachrome tautomerase gene                                                                    | 0.90                  | 12.23    | 0.0734                     |
| ENSMUSG00000047260 | <i>Tmem93</i>      | Transmembrane protein 93 gene                                                                    | 0.59                  | 8.10     | 0.0734                     |
| ENSMUSG00000028017 | <i>Egf</i>         | Epidermal growth factor gene                                                                     | 0.85                  | 11.57    | 0.0737                     |
| ENSMUSG00000051154 | <i>Comm3</i>       | COMM domain containing 3 gene                                                                    | 2.57                  | 34.82    | 0.0739                     |

| Ensemble gene      | Gene                 |                                                                                                            | Relative fluorescence |          |                         |
|--------------------|----------------------|------------------------------------------------------------------------------------------------------------|-----------------------|----------|-------------------------|
|                    | Symbol               | Description                                                                                                | Islets                | Pancreas | Ratio (islets:pancreas) |
| ENSMUSG00000025208 | <i>Mrpl43</i>        | Mitochondrial ribosomal protein L43 gene                                                                   | 0.83                  | 11.27    | 0.0740                  |
| ENSMUSG00000022337 | <i>Ttc35</i>         | Tetratricopeptide repeat domain 35 gene                                                                    | 0.98                  | 13.28    | 0.0741                  |
| ENSMUSG00000025204 | <i>Ndufb8</i>        | NADH dehydrogenase (ubiquinone) 1 beta subcomplex 8 gene                                                   | 5.81                  | 78.37    | 0.0742                  |
| ENSMUSG00000060675 | <i>Hrasls3</i>       | Phospholipase A2, group XVI gene                                                                           | 0.72                  | 9.65     | 0.0742                  |
| ENSMUSG00000016559 | <i>H3f3b</i>         | H3 histone, family 3B gene                                                                                 | 6.32                  | 85.11    | 0.0742                  |
| ENSMUSG00000024215 | <i>Spdef</i>         | SAM pointed domain containing ets transcription factor gene                                                | 0.33                  | 4.49     | 0.0743                  |
| ENSMUSG00000041650 | <i>Pcca</i>          | Propionyl-Coenzyme A carboxylase, alpha polypeptide gene                                                   | 0.56                  | 7.56     | 0.0747                  |
| ENSMUSG00000017002 | <i>Slpi</i>          | Secretory leukocyte peptidase inhibitor gene                                                               | 0.50                  | 6.75     | 0.0747                  |
| ENSMUSG00000058833 | <i>2810428I15Rik</i> | RIKEN cdna 2810428I15 gene gene                                                                            | 1.01                  | 13.54    | 0.0748                  |
| ENSMUSG00000030691 | <i>Fchs2</i>         | FCH and double SH3 domains 2 gene                                                                          | 0.43                  | 5.70     | 0.0749                  |
| ENSMUSG00000030208 | <i>Emp1</i>          | Epithelial membrane protein 1 gene                                                                         | 0.58                  | 7.65     | 0.0754                  |
| ENSMUSG00000032060 | <i>Cryab</i>         | Crystallin, alpha B gene                                                                                   | 0.71                  | 9.38     | 0.0756                  |
| ENSMUSG00000028542 | <i>Slc6a9</i>        | Solute carrier family 6 (neurotransmitter transporter, glycine), member 9 gene                             | 0.72                  | 9.29     | 0.0773                  |
| ENSMUSG00000029275 | <i>Gfi1</i>          | Growth factor independent 1 gene                                                                           | 0.44                  | 5.63     | 0.0775                  |
| ENSMUSG00000024414 | <i>Mrpl27</i>        | Mitochondrial ribosomal protein L27 gene                                                                   | 1.21                  | 15.61    | 0.0776                  |
| ENSMUSG00000022193 | <i>Psb5</i>          | Proteasome (prosome, macropain) subunit, beta type 5 gene                                                  | 0.93                  | 11.96    | 0.0778                  |
| ENSMUSG00000031451 | <i>Gas6</i>          | Growth arrest specific 6 gene                                                                              | 0.52                  | 6.56     | 0.0786                  |
| ENSMUSG00000074457 | <i>S100a16</i>       | S100 calcium binding protein A16 gene                                                                      | 0.86                  | 10.93    | 0.0786                  |
| ENSMUSG00000024782 | <i>Ak3</i>           | Adenylate kinase 3 gene                                                                                    | 0.58                  | 7.32     | 0.0791                  |
| ENSMUSG00000038312 | <i>Edem2</i>         | ER degradation enhancer, mannosidase alpha-like 2 gene                                                     | 4.66                  | 58.81    | 0.0792                  |
| ENSMUSG00000043003 | <i>Rasef</i>         | RAS and EF hand domain containing gene                                                                     | 0.38                  | 4.75     | 0.0792                  |
| ENSMUSG00000024646 | <i>Cyb5</i>          | Cytochrome b-5 gene                                                                                        | 1.58                  | 19.78    | 0.0796                  |
| ENSMUSG00000018770 | <i>Atp5g3</i>        | ATP synthase, H <sup>+</sup> transporting, mitochondrial F0 complex, subunit c (subunit 9), isoform 3 gene | 23.79                 | 297.99   | 0.0798                  |
| ENSMUSG00000032527 | <i>Pccb</i>          | Propionyl Coenzyme A carboxylase, beta polypeptide gene                                                    | 1.26                  | 15.76    | 0.0799                  |
| ENSMUSG00000016427 | <i>Ndufa1</i>        | NADH dehydrogenase (ubiquinone) 1 alpha subcomplex, 1 gene                                                 | 21.37                 | 266.78   | 0.0801                  |
| ENSMUSG00000030934 | <i>Oat</i>           | Ornithine aminotransferase gene                                                                            | 0.69                  | 8.64     | 0.0801                  |
| ENSMUSG00000003948 | <i>Mmd</i>           | Monocyte to macrophage differentiation-associated gene                                                     | 0.98                  | 12.17    | 0.0809                  |
| ENSMUSG00000040577 | <i>Al672047.10</i>   |                                                                                                            | AL672047.10           | 22.21    | 12.35                   |
| ENSMUSG00000038009 | <i>Dnajc22</i>       | Dnaj (Hsp40) homolog, subfamily C, member 22 gene                                                          | 0.46                  | 5.64     | 0.0812                  |
| ENSMUSG00000028945 | <i>Rheb</i>          | RAS-homologue enriched in brain gene                                                                       | 1.65                  | 20.21    | 0.0816                  |

| Ensemble gene       | Gene                 |                                                                                                 | Relative fluorescence |          |                         |
|---------------------|----------------------|-------------------------------------------------------------------------------------------------|-----------------------|----------|-------------------------|
|                     | Symbol               | Description                                                                                     | Islets                | Pancreas | Ratio (islets:pancreas) |
| ENSMUSG00000022993  | <i>4930415O20Rik</i> | RIKEN cdna 4930415O20 gene gene                                                                 | 0.51                  | 6.27     | 0.0820                  |
| ENSMUSG00000003099  | <i>Ppp5c</i>         | Protein phosphatase 5, catalytic subunit gene                                                   | 0.85                  | 10.31    | 0.0821                  |
| ENSMUSG000000062352 | <i>Itgb1bp1</i>      | Integrin beta 1 binding protein 1 gene                                                          | 1.10                  | 13.28    | 0.0826                  |
| ENSMUSG000000060147 | <i>Serpinb6a</i>     | Serine (or cysteine) peptidase inhibitor, clade B, member 6a gene                               | 1.24                  | 14.97    | 0.0827                  |
| ENSMUSG000000031357 | <i>Syap1</i>         | Synapse associated protein 1 gene                                                               | 1.47                  | 17.72    | 0.0830                  |
| ENSMUSG000000018569 | <i>Cldn7</i>         | Claudin 7 gene                                                                                  | 0.55                  | 6.57     | 0.0832                  |
| ENSMUSG000000022551 | <i>Cyc1</i>          | Cytochrome c-1 gene                                                                             | 4.14                  | 49.55    | 0.0835                  |
| ENSMUSG000000071180 | <i>2810008M24Rik</i> | RIKEN cdna 2810008M24 gene gene                                                                 | 1.02                  | 12.17    | 0.0835                  |
| ENSMUSG000000026209 | <i>Dnpep</i>         | Aspartyl aminopeptidase gene                                                                    | 0.79                  | 9.37     | 0.0838                  |
| ENSMUSG000000049493 | <i>Pls1</i>          | Plastin 1 (I-isoform) gene                                                                      | 0.44                  | 5.28     | 0.0841                  |
| ENSMUSG000000024387 | <i>Csnk2b</i>        | Casein kinase 2, beta polypeptide gene                                                          | 1.23                  | 14.58    | 0.0845                  |
| ENSMUSG000000057163 | <i>Prss2</i>         | Protease, serine, 2 gene                                                                        | 72.00                 | 847.61   | 0.0850                  |
| ENSMUSG000000021477 | <i>Ctsl</i>          | Cathepsin L gene                                                                                | 2.93                  | 34.50    | 0.0850                  |
| ENSMUSG000000060063 | <i>Alox5ap</i>       | Arachidonate 5-lipoxygenase activating protein gene                                             | 0.34                  | 4.04     | 0.0850                  |
| ENSMUSG000000070473 | <i>Cldn3</i>         | Claudin 3 gene                                                                                  | 0.66                  | 7.75     | 0.0851                  |
| ENSMUSG000000025503 | <i>Taldo1</i>        | Transaldolase 1 gene                                                                            | 1.16                  | 13.57    | 0.0853                  |
| ENSMUSG000000037071 | <i>Scd1</i>          | Stearoyl-Coenzyme A desaturase 1 gene                                                           | 0.29                  | 3.36     | 0.0853                  |
| ENSMUSG000000027447 | <i>Cst3</i>          | Cystatin C gene                                                                                 | 19.09                 | 223.48   | 0.0854                  |
| ENSMUSG000000021939 | <i>Ctsb</i>          | Cathepsin B gene                                                                                | 2.73                  | 31.76    | 0.0859                  |
| ENSMUSG000000035765 | <i>Dym</i>           | Dymeclin gene                                                                                   | 0.86                  | 10.03    | 0.0861                  |
| ENSMUSG000000023175 | <i>Bsg</i>           | Basigin gene                                                                                    | 4.61                  | 53.48    | 0.0862                  |
| ENSMUSG000000026087 | <i>Mrpl30</i>        | Mitochondrial ribosomal protein L30 gene                                                        | 9.74                  | 112.88   | 0.0863                  |
| ENSMUSG000000041935 | <i>AW549877</i>      | UPF0600 protein c5orf51 homologue                                                               | 1.68                  | 19.46    | 0.0863                  |
| ENSMUSG000000025868 | <i>Higd2a</i>        | HIG1 domain family, member 2A gene                                                              | 2.67                  | 30.87    | 0.0866                  |
| ENSMUSG000000032485 | <i>Scap</i>          | SREBF chaperone gene                                                                            | 1.23                  | 14.17    | 0.0870                  |
| ENSMUSG000000010095 | <i>Slc3a2</i>        | Solute carrier family 3 (activators of dibasic and neutral amino acid transport), member 2 gene | 8.11                  | 93.20    | 0.0870                  |
| ENSMUSG000000029465 | <i>Arpc3</i>         | Actin related protein 2/3 complex, subunit 3 gene                                               | 2.07                  | 23.73    | 0.0872                  |
| ENSMUSG000000029882 | <i>2210010C04Rik</i> | RIKEN cdna 2210010C04 gene gene                                                                 | 49.56                 | 567.64   | 0.0873                  |
| ENSMUSG000000018446 | <i>C1qbp</i>         | Complement component 1, q subcomponent binding protein gene                                     | 2.95                  | 33.72    | 0.0873                  |
| ENSMUSG000000049521 | <i>Cdc42ep1</i>      | CDC42 effector protein (Rho gtpase binding) 1 gene                                              | 0.71                  | 8.17     | 0.0873                  |
| ENSMUSG000000055723 | <i>Rras2</i>         | Related RAS viral (r-ras) oncogene homologue 2 gene                                             | 0.58                  | 6.65     | 0.0873                  |

| Ensemble gene       | Gene                 |                                                                                              | Relative fluorescence |          |                         |
|---------------------|----------------------|----------------------------------------------------------------------------------------------|-----------------------|----------|-------------------------|
|                     | Symbol               | Description                                                                                  | Islets                | Pancreas | Ratio (islets:pancreas) |
| ENSMUSG00000020116  | <i>Pno1</i>          | Partner of NOB1 homologue (S. Cerevisiae) gene                                               | 0.68                  | 7.71     | 0.0880                  |
| ENSMUSG00000030800  | <i>Prss8</i>         | Protease, serine, 8 (prostatic) gene                                                         | 0.29                  | 3.29     | 0.0884                  |
| ENSMUSG00000001627  | <i>Ifrd1</i>         | Interferon-related developmental regulator 1 gene                                            | 9.72                  | 109.30   | 0.0890                  |
| ENSMUSG00000001665  | <i>Gstt3</i>         | Glutathione S-transferase, theta 3 gene                                                      | 0.22                  | 2.45     | 0.0890                  |
| ENSMUSG000000028161 | <i>Ppp3ca</i>        | Protein phosphatase 3, catalytic subunit, alpha isoform gene                                 | 0.86                  | 9.65     | 0.0892                  |
| ENSMUSG000000028648 | <i>Ndufs5</i>        | NADH dehydrogenase (ubiquinone) Fe-S protein 5 gene                                          | 1.65                  | 18.38    | 0.0897                  |
| ENSMUSG000000064215 | <i>D12Erd647e</i>    | ISG12a protein putative uncharacterized protein ;                                            | 2.34                  | 26.11    | 0.0898                  |
| ENSMUSG000000031948 | <i>Kars</i>          | Lysyl-trna synthetase gene                                                                   | 0.78                  | 8.67     | 0.0902                  |
| ENSMUSG000000062753 | <i>AI413582</i>      | Putative uncharacterized protein                                                             | 0.34                  | 3.78     | 0.0903                  |
| ENSMUSG000000021361 | <i>Tmem14c</i>       | Transmembrane protein 14C gene                                                               | 0.43                  | 4.79     | 0.0904                  |
| ENSMUSG000000034875 | <i>Nudt19</i>        | Nudix (nucleoside diphosphate linked moiety X)-type motif 19 gene                            | 0.44                  | 4.85     | 0.0906                  |
| ENSMUSG000000019843 | <i>Fyn</i>           | Fyn proto-oncogene gene                                                                      | 0.71                  | 7.78     | 0.0907                  |
| ENSMUSG000000022751 | <i>Nit2</i>          | Nitrilase family, member 2 gene                                                              | 0.43                  | 4.72     | 0.0907                  |
| ENSMUSG000000018761 | <i>Mpdu1</i>         | Mannose-P-dolichol utilization defect 1 gene                                                 | 0.62                  | 6.83     | 0.0914                  |
| ENSMUSG000000025492 | <i>Ifitm3</i>        | Interferon induced transmembrane protein 3 gene                                              | 10.94                 | 118.75   | 0.0921                  |
| ENSMUSG000000019158 | <i>Tmem160</i>       | Transmembrane protein 160 gene                                                               | 1.61                  | 17.48    | 0.0923                  |
| ENSMUSG000000028708 | <i>Mknk1</i>         | MAP kinase-interacting serine/threonine kinase 1 gene                                        | 1.35                  | 14.59    | 0.0925                  |
| ENSMUSG000000037573 | <i>Tob1</i>          | Transducer of erbb-2.1 gene                                                                  | 0.73                  | 7.89     | 0.0925                  |
| ENSMUSG000000017188 | <i>Ccdc56</i>        | Coiled-coil domain containing 56 gene                                                        | 2.95                  | 31.83    | 0.0927                  |
| ENSMUSG000000024479 | <i>Mal2</i>          | Mal, T-cell differentiation protein 2 gene                                                   | 0.29                  | 3.15     | 0.0927                  |
| ENSMUSG000000009092 | <i>Derl3</i>         | Der1-like domain family, member 3 gene                                                       | 2.10                  | 22.60    | 0.0929                  |
| ENSMUSG000000029815 | <i>2410003K15Rik</i> | RIKEN cdna 2410003K15 gene gene                                                              | 1.78                  | 19.00    | 0.0935                  |
| ENSMUSG000000031957 | <i>Ptrb1</i>         | Chymotrypsinogen B1 gene                                                                     | 78.06                 | 834.65   | 0.0935                  |
| ENSMUSG000000020263 | <i>Appl2</i>         | Adaptor protein, phosphotyrosine interaction, PH domain and leucine zipper containing 2 gene | 7.99                  | 85.39    | 0.0935                  |
| ENSMUSG000000031505 | <i>0710008K08Rik</i> | Carbohydrate kinase domain containing gene                                                   | 2.60                  | 27.76    | 0.0935                  |
| ENSMUSG000000033684 | <i>Qsox1</i>         | Quiescin Q6 sulfhydryl oxidase 1 gene                                                        | 0.89                  | 9.53     | 0.0936                  |
| ENSMUSG000000014402 | <i>Tsg101</i>        | Tumor susceptibility gene 101 gene                                                           | 0.70                  | 7.47     | 0.0936                  |
| ENSMUSG000000026090 | <i>2010300C02Rik</i> | RIKEN cdna 2010300C02 gene gene                                                              | 0.89                  | 9.44     | 0.0940                  |
| ENSMUSG000000018189 | <i>Uchl5</i>         | Ubiquitin carboxyl-terminal esterase L5 gene                                                 | 2.44                  | 25.97    | 0.0942                  |
| ENSMUSG000000024908 | <i>Saps3</i>         | SAPS domain family, member 3 gene                                                            | 0.43                  | 4.61     | 0.0942                  |
| ENSMUSG000000001119 | <i>Col6a1</i>        | Collagen, type VI, alpha 1 gene                                                              | 0.98                  | 10.42    | 0.0944                  |

| Ensemble gene      | Gene          |                                                                         | Relative fluorescence |          |                         |
|--------------------|---------------|-------------------------------------------------------------------------|-----------------------|----------|-------------------------|
|                    | Symbol        | Description                                                             | Islets                | Pancreas | Ratio (islets:pancreas) |
| ENSMUSG00000038607 | <i>Gng10</i>  | Guanine nucleotide binding protein (G protein), gamma 10 gene           | 3.09                  | 32.69    | 0.0947                  |
| ENSMUSG00000020029 | <i>Nudt4</i>  | Nudix (nucleoside diphosphate linked moiety X)-type motif 4 gene        | 0.54                  | 5.67     | 0.0949                  |
| ENSMUSG00000020267 | <i>Hint1</i>  | Histidine triad nucleotide binding protein 1 gene                       | 26.14                 | 273.12   | 0.0957                  |
| ENSMUSG00000037095 | <i>Lrg1</i>   | Leucine-rich alpha-2-glycoprotein 1 gene                                | 0.41                  | 4.33     | 0.0958                  |
| ENSMUSG00000005779 | <i>Psmb4</i>  | Proteasome (prosome, macropain) subunit, beta type 4 gene               | 2.19                  | 22.65    | 0.0967                  |
| ENSMUSG00000001025 | <i>S100a6</i> | S100 calcium binding protein A6 (calcyclin) gene                        | 0.68                  | 6.99     | 0.0969                  |
| ENSMUSG00000063856 | <i>Gpx1</i>   | Glutathione peroxidase 1 gene                                           | 3.66                  | 37.70    | 0.0970                  |
| ENSMUSG00000026421 | <i>Csrp1</i>  | Cysteine and glycine-rich protein 1 gene                                | 0.88                  | 9.01     | 0.0971                  |
| ENSMUSG00000030653 | <i>Pde2a</i>  | Phosphodiesterase 2A, cgmp-stimulated gene                              | 0.85                  | 8.72     | 0.0974                  |
| ENSMUSG00000066026 | <i>Dhrs3</i>  | Dehydrogenase/reductase (SDR family) member 3 gene                      | 0.86                  | 8.81     | 0.0978                  |
| ENSMUSG00000030762 | <i>Aqp8</i>   | Aquaporin 8 gene                                                        | 0.56                  | 5.67     | 0.0982                  |
| ENSMUSG00000000001 | <i>Gnai3</i>  | Guanine nucleotide binding protein (G protein), alpha inhibiting 3 gene | 1.10                  | 11.15    | 0.0984                  |
| ENSMUSG00000024225 | <i>Clps</i>   | Colipase, pancreatic gene                                               | 120.02                | 1208.83  | 0.0993                  |
| ENSMUSG00000005873 | <i>Reep5</i>  | Receptor accessory protein 5 gene                                       | 3.06                  | 30.85    | 0.0993                  |
| ENSMUSG00000033020 | <i>Polr2f</i> | Polymerase (RNA) II (DNA directed) polypeptide F gene                   | 1.08                  | 10.84    | 0.0997                  |

The fluorescence intensities from islet and pancreas samples for each of the ~10,000 transcripts expressed were normalised to the median fluorescence intensity of the respective tissue sample (CHF,  $n=6$ ) and used for calculation of the ratio of relative intensities (islets:pancreas) as a measure of islet-enrichment and depletion of transcripts from exocrine and ductal origin, respectively
