# Supplementary material for: Diet-induced gene expression of isolated pancreatic islets from a polygenic mouse model of the metabolic syndrome
Source: PubMed Central journal article supplement — Diabetologia. 2009 Nov 10;53(2):309–20. doi: 10.1007/s00125-009-1576-4 (PMC2797618; doi:10.1007/s00125-009-1576-4), 2009-11-10
Supplement: 125_2009_1576_MOESM6_ESM.pdf [file 125_2009_1576_MOESM6_ESM.pdf]

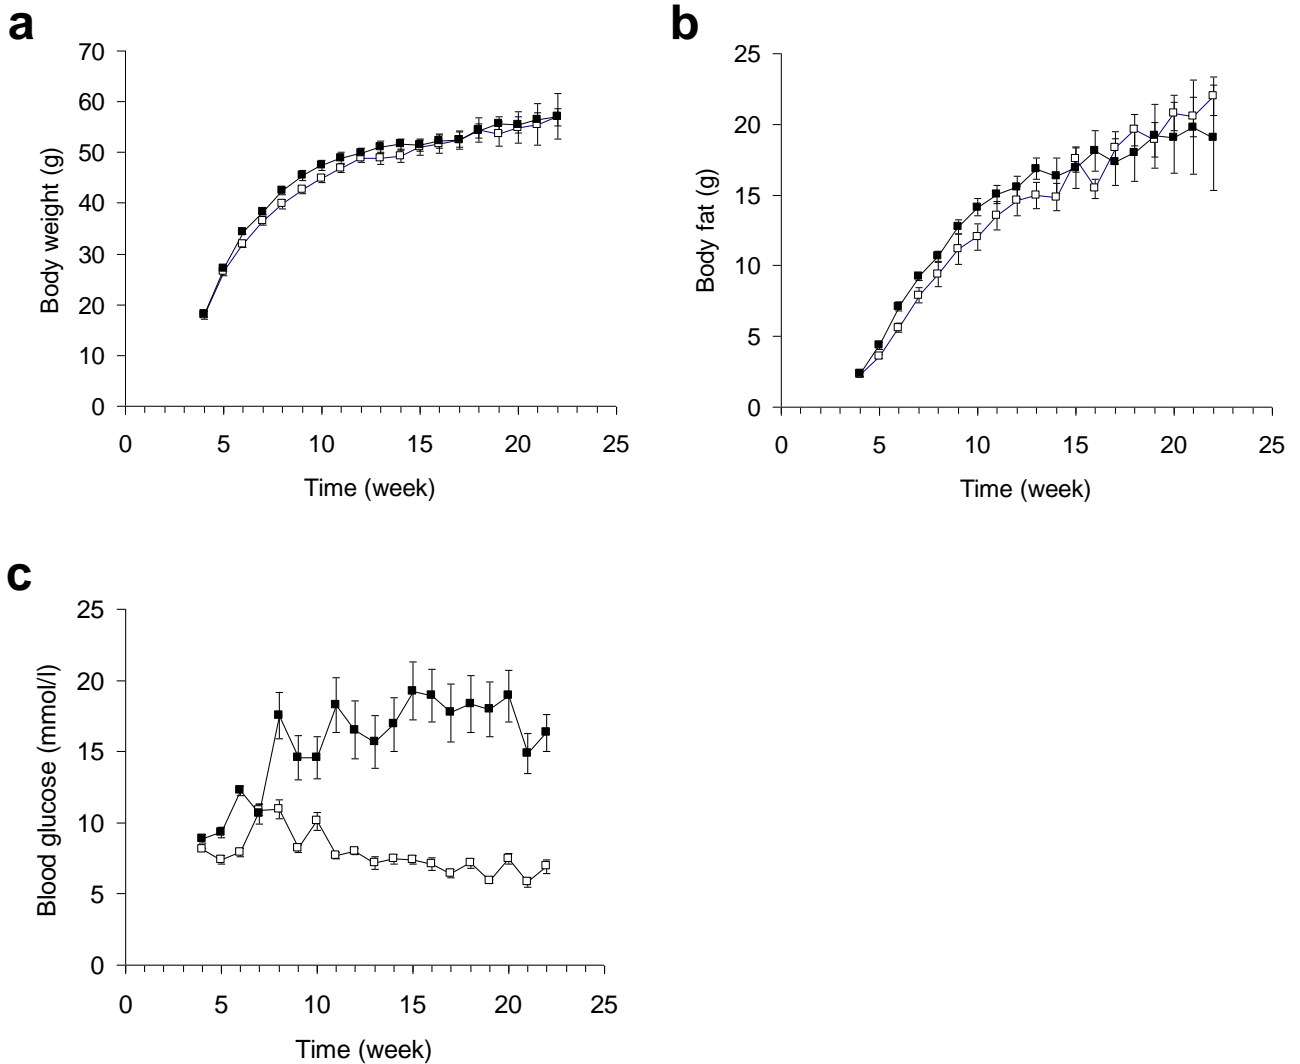

**Electronic supplementary material**

**ESM Fig. 2** Development of obesity and hyperglycaemia in NZL mice. Beginning at week 3, male NZL mice were fed either HF (black squares) or CHF diet (white squares). Body weight (**a**), body fat content (**b**) and mean blood glucose levels (**c**) are shown. Data are mean SE of 14–16 mice per group
