# Supplementary material for: Diet-induced gene expression of isolated pancreatic islets from a polygenic mouse model of the metabolic syndrome
Source: PubMed Central journal article supplement — Diabetologia. 2009 Nov 10;53(2):309–20. doi: 10.1007/s00125-009-1576-4 (PMC2797618; doi:10.1007/s00125-009-1576-4), 2009-11-10
Supplement: 125_2009_1576_MOESM7_ESM.pdf [file 125_2009_1576_MOESM7_ESM.pdf]

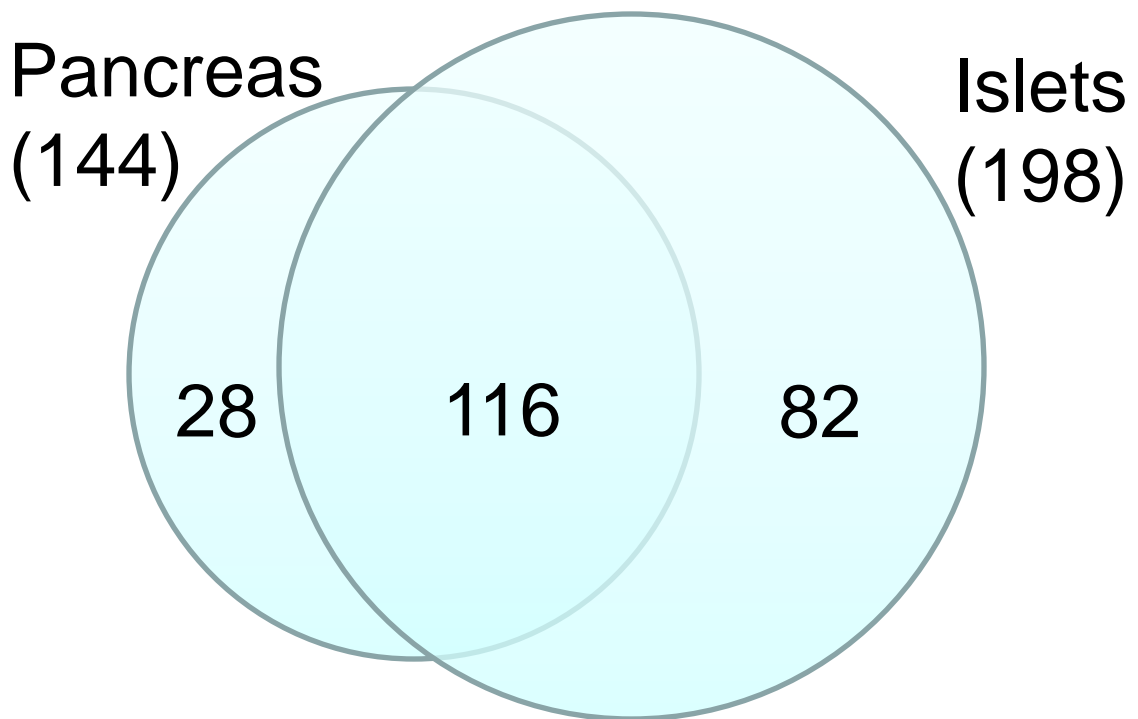

**Electronic supplementary material**

**ESM Fig. 3** Venn diagram of expression pattern for GWA genes associated with type 2 diabetes. In the two publicly available GWAs (DGI, WTCCC), 439 human genes were nominally associated with type 2 diabetes. From the corresponding 430 mouse orthologues identified, 345 genes were represented on the Affymetrix 430A2.0 gene chip. Of those, 226 genes were expressed in islets or total pancreas, 28 in pancreas only, 82 exclusively in islets and 116 in both pancreas and islet cells
