# Supplementary material for: Diet-induced gene expression of isolated pancreatic islets from a polygenic mouse model of the metabolic syndrome
Source: PubMed Central journal article supplement — Diabetologia. 2009 Nov 10;53(2):309–20. doi: 10.1007/s00125-009-1576-4 (PMC2797618; doi:10.1007/s00125-009-1576-4), 2009-11-10
Supplement: 125_2009_1576_MOESM8_ESM.pdf [file 125_2009_1576_MOESM8_ESM.pdf]

**a**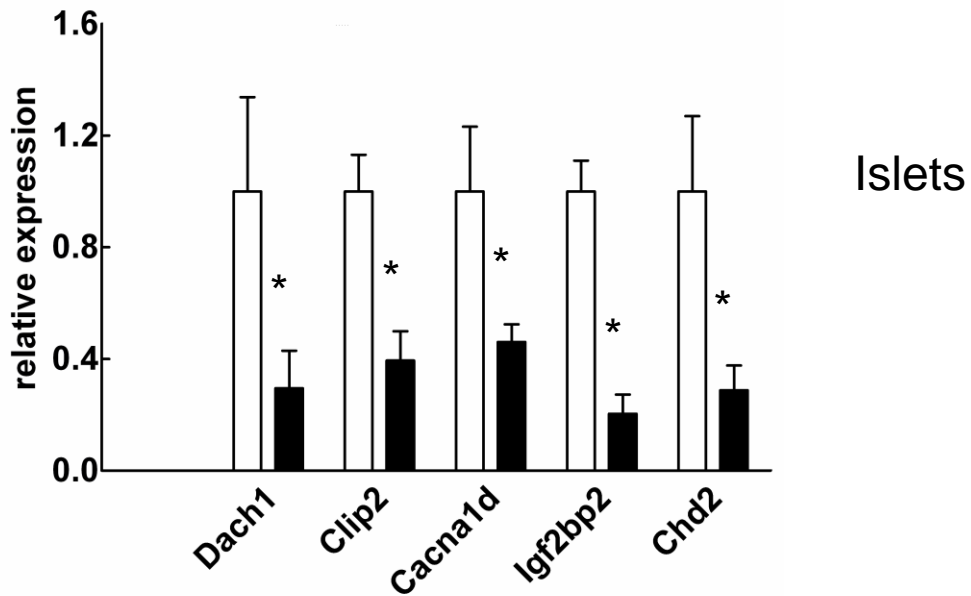**b**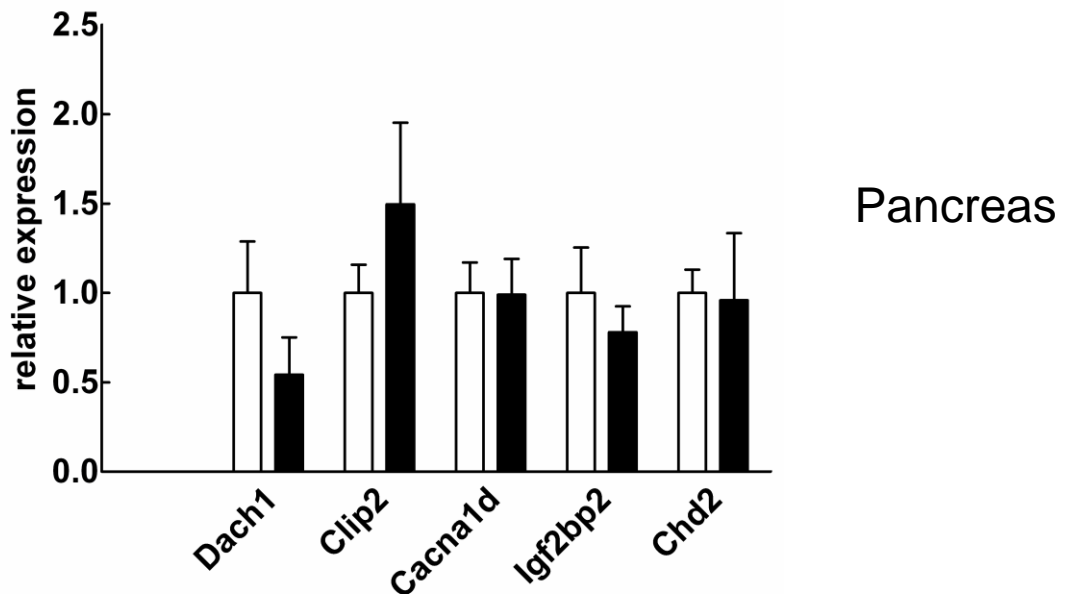**Electronic supplementary material**

**ESM Fig. 4** Validation of differential expression by TaqMan quantitative real-time PCR. **a** Diet-induced changes (white bars, CHF diet; black bars, HF diet) in gene expression in LCM-isolated islets and **(b)** in total pancreas of mouse genes whose human orthologues were nominally associated with type 2 diabetes in two GWAs (DGI, WTCCC). Values are normalised to *Actb*. Data are mean  $\pm$  SE of five separate mice per group. \* $p \leq 0.05$
